# Supplementary material for: Logistic regression analysis of factors influencing the effectiveness of intensive sound masking therapy in patients with tinnitus
Source: PubMed Central journal article supplement — BMJ Open. 2017 Nov 15;7(11):e018050. doi: 10.1136/bmjopen-2017-018050 (PMC5695311; doi:10.1136/bmjopen-2017-018050), 2017-11-15
Supplement: bmjopen-2017-018050.draft_revisions.pdf [file bmjopen-2017-018050.draft_revisions.pdf]

# BMJ Open

BMJ Open is committed to open peer review. As part of this commitment we make the peer review history of every article we publish publicly available.

When an article is published we post the peer reviewers' comments and the authors' responses online. We also post the versions of the paper that were used during peer review. These are the versions that the peer review comments apply to.

The versions of the paper that follow are the versions that were submitted during the peer review process. They are not the versions of record or the final published versions. They should not be cited or distributed as the published version of this manuscript.

BMJ Open is an open access journal and the full, final, typeset and author-corrected version of record of the manuscript is available on our site with no access controls, subscription charges or pay-per-view fees (<http://bmjopen.bmj.com>).

If you have any questions on BMJ Open's open peer review process please email [editorial.bmjopen@bmj.com](mailto:editorial.bmjopen@bmj.com)

# BMJ Open

## Logistic Regression Analysis of the Influencing Factors Associated with Effectiveness of Intensive Sound Masking Therapy in Patients with Tinnitus

|                                 |                                                                                                                                                                                                                                                                                                                                                                                                                                                                                                                                                                                                                                                                                                                                                                                                                                                                                                                                                                                                     |
|---------------------------------|-----------------------------------------------------------------------------------------------------------------------------------------------------------------------------------------------------------------------------------------------------------------------------------------------------------------------------------------------------------------------------------------------------------------------------------------------------------------------------------------------------------------------------------------------------------------------------------------------------------------------------------------------------------------------------------------------------------------------------------------------------------------------------------------------------------------------------------------------------------------------------------------------------------------------------------------------------------------------------------------------------|
| Journal:                        | <i>BMJ Open</i>                                                                                                                                                                                                                                                                                                                                                                                                                                                                                                                                                                                                                                                                                                                                                                                                                                                                                                                                                                                     |
| Manuscript ID                   | bmjopen-2017-018050                                                                                                                                                                                                                                                                                                                                                                                                                                                                                                                                                                                                                                                                                                                                                                                                                                                                                                                                                                                 |
| Article Type:                   | Research                                                                                                                                                                                                                                                                                                                                                                                                                                                                                                                                                                                                                                                                                                                                                                                                                                                                                                                                                                                            |
| Date Submitted by the Author:   | 05-Jun-2017                                                                                                                                                                                                                                                                                                                                                                                                                                                                                                                                                                                                                                                                                                                                                                                                                                                                                                                                                                                         |
| Complete List of Authors:       | Cai, Yuexin; Sun Yat-Sen Memorial Hospital, Department of Otolaryngology<br>Zhou, Qian; Institute of Hearing and Speech-Language Science, Sun Yat-sen University<br>Yang, Haidi; Sun Yat-Sen Memorial Hospital, Department of Otolaryngology<br>Jiang, Jiajia; Sun Yat-Sen Memorial Hospital, Department of Otolaryngology<br>Zhao, Fei; Cardiff Metropolitan University, 2. Department of Speech Language Therapy and Hearing Science<br>Huang, Xiayin; Sun Yat-Sen Memorial Hospital, Department of Otolaryngology<br>Mo, Hanjie; Sun Yat-Sen Memorial Hospital, Department of Otolaryngology<br>Chen, Xiaoting; Sun Yat-Sen Memorial Hospital, Department of Otolaryngology<br>Xiong, Hao; Sun Yat-Sen Memorial Hospital, Department of Otolaryngology<br>Chen, Suijun; Sun Yat-Sen Memorial Hospital, Department of Otolaryngology<br>Zhang, Xueyuan; Sun Yat-Sen Memorial Hospital, Department of Otolaryngology<br>zheng, yiqing; Sun Yat-Sen Memorial Hospital, Department of Otolaryngology |
| <b>Primary Subject Heading</b>: | Ear, nose and throat/otolaryngology                                                                                                                                                                                                                                                                                                                                                                                                                                                                                                                                                                                                                                                                                                                                                                                                                                                                                                                                                                 |
| Secondary Subject Heading:      | Medical publishing and peer review                                                                                                                                                                                                                                                                                                                                                                                                                                                                                                                                                                                                                                                                                                                                                                                                                                                                                                                                                                  |
| Keywords:                       | Sound Masking, Tinnitus, Audiometric Configuration, Prognostic Factors                                                                                                                                                                                                                                                                                                                                                                                                                                                                                                                                                                                                                                                                                                                                                                                                                                                                                                                              |
|                                 |                                                                                                                                                                                                                                                                                                                                                                                                                                                                                                                                                                                                                                                                                                                                                                                                                                                                                                                                                                                                     |

SCHOLARONE™  
Manuscripts

1  
2  
3  
4  
5  
6  
7  
8  
9  
10  
11  
12  
13  
14  
15  
16  
17  
18  
19  
20  
21  
22  
23  
24  
25  
26  
27  
28  
29  
30  
31  
32  
33  
34  
35  
36  
37  
38  
39  
40  
41  
42  
43  
44  
45  
46  
47  
48  
49  
50  
51  
52  
53  
54  
55  
56  
57  
58  
59  
60

## Logistic Regression Analysis of the Influencing Factors Associated with Effectiveness of Intensive Sound Masking Therapy in Patients with Tinnitus

Yuexin Cai<sup>1,2,\*</sup>, Qian Zhou<sup>3,\*</sup>, Haidi Yang<sup>1,2</sup>, Jiajia Jiang<sup>1,2</sup>, Fei Zhao<sup>4,5</sup>, Xiayin Huang<sup>1,2</sup>, Hanjie Mo<sup>1,2</sup>, Xiaoting Chen<sup>1,2</sup>, Hao Xiong<sup>1,2</sup>, Suijun Chen<sup>1,2</sup>, Xueyuan Zhang<sup>1,2</sup>, Yiqing Zheng<sup>1,2,a</sup>

<sup>1</sup>Department of Otolaryngology, Sun Yat-sen Memorial Hospital, Sun Yat-sen University, Guangzhou City, Guangdong Province, China

<sup>2</sup>Institute of Hearing and Speech-Language Science, Sun Yat-sen University, Guangzhou City, Guangdong Province, China

<sup>3</sup>Clinical research center, The First Affiliated Hospital, Sun Yat-sen University.

<sup>4</sup>Department of Speech Language Therapy and Hearing Science, Cardiff Metropolitan University, Cardiff, Wales.

<sup>5</sup>Department of Hearing and Speech Science, Xinhua College, Sun Yat-Sen University, Guangzhou, China.

\*Yuexin Cai and Qian Zhou contributed equally to this work.

<sup>a</sup>Author to whom correspondence should be addressed;

Electronic mail: yiqingzheng@hotmail.com

Phone number: +86 (0) 02081332115

Fax number: +86 (0) 02081332115

### Abstract

**Objectives:** Investigate influencing factors of intensive sound masking therapy on tinnitus using Logistic Regression Analysis, which would contribute to predict effectiveness of sound masking intervention for patients with tinnitus.

**Design:** The study used a retrospective cross-section analysis.

**Participants:** A total of 102 patients with tinnitus were recruited at the Sun Yat-sen Memorial Hospital of Sun Yat-sen University, China.

**Intervention:** Intensive sound masking therapy was used as an intervention approach for patients with tinnitus.

**Primary and secondary outcome measures:** All participants underwent audiological investigations and tinnitus pitch and loudness matching measurements, follow by

1  
2  
3 seven days sound masking intervention. The Tinnitus Handicap Inventory (THI) was  
4 used as the outcome measures before and after the sound marking intervention.  
5

6  
7 Multivariate logistic regression models were performed to assess the independent  
8 association of socio-demographic and tinnitus relevant factors with effective therapy.  
9

10 **Results:** According to the THI score changes *pre*-and *post*-sound masking  
11 intervention, fifty-one participants were entered in the effective group, whereas the  
12 remaining 51 participants were in the non-effective group. Student *t*-test showed that  
13 participants in the effective group were significantly younger than those in the  
14 non-effective group. In addition, significantly higher flat audiogram configurations  
15 were found in the effective group than in non-effective group. Further multivariable  
16 logistic regression analysis showed that age had negative influence on therapeutic  
17 effectiveness, while flat audiogram configurations and THI score before treatment  
18 were positively associated with therapeutic effectiveness.  
19

20  
21 **Conclusion:** Flat audiogram, younger age, and higher THI scores before treatment  
22 appear the predictive factors for having significant effective outcomes of sound  
23 masking treatment. However, gender, tinnitus laterality, duration and hearing  
24 threshold seem not to be related to the effectiveness of intensive sound masking  
25 treatment.  
26

27  
28  
29 **Key Words:**

30 Sound Masking; Tinnitus; Audiometric Configuration; Prognostic Factors  
31  
32  
33  
34  
35  
36  
37  
38  
39  
40  
41  
42  
43  
44  
45  
46  
47  
48  
49  
50  
51  
52  
53  
54  
55  
56  
57  
58  
59  
60

## ARTICLE SUMMARY

### Article focus

1. Are there any influencing factors associated with short-term effectiveness after intensive sound masking therapy in patients with tinnitus?
2. If so, can these factors be used to predict effectiveness of sound masking intervention for patients with tinnitus?

### Key Messages

1. Flat audiogram, younger age, and higher THI scores before treatment appear the predictive factors associated with significant effective outcomes of sound masking treatment.
2. Gender, tinnitus laterality, duration and hearing threshold seem not to be related to the effectiveness of intensive sound masking treatment.
3. Future prospective longitudinal research is needed to explore the long-term effectiveness of sound masking.

### Strengths

- A relatively large sample of participants were included in the present study;
- A robust analytical method (i.e., Logistic regression) was employed to explore the predictive factors associated with significant effective outcomes of sound masking treatment.

### Limitation

- 1  
2  
3  
4 • Due to patient adherence in the context of Chinese culture and Healthcare system, only  
5  
6 intensive sound masking intervention was provided, and the short-term effectiveness  
7  
8 was subsequently assessed.  
9  
10  
11  
12  
13  
14  
15  
16  
17  
18  
19  
20  
21  
22  
23  
24  
25  
26  
27  
28  
29  
30  
31  
32  
33  
34  
35  
36  
37  
38  
39  
40  
41  
42  
43  
44  
45  
46  
47  
48  
49  
50  
51  
52  
53  
54  
55  
56  
57  
58  
59  
60
- Due to patient adherence in the context of Chinese culture and Healthcare system, only intensive sound masking intervention was provided, and the short-term effectiveness was subsequently assessed.

## INTRODUCTION :

Tinnitus is the perception of noise in the absence of any external sound. It is considered as one of the most common and disturbing health problems<sup>1</sup>. Epidemiological studies indicate that one third of all adults report experiencing tinnitus at some time in their lives and 10 to 15% have prolonged tinnitus requiring medical interventions<sup>2</sup>. Although a number of interventions are available for tinnitus management within ENT/Audiology clinics, at present, no particular treatment for tinnitus has been found effective in all patients with tinnitus<sup>3,4</sup>. Moreover, there are large discrepancies in terms of effectiveness because of the complex mechanisms behind the symptoms and the severity of impact on sufferers, as well as many influencing factors such as age, tinnitus duration and degree of hearing loss<sup>1,5</sup>.

A recent study by Theodoroff et al.<sup>1</sup> found that younger age, better self-reported hearing problem, shorter durations of tinnitus and better hearing threshold at low frequency were positive predictors of the effectiveness of tinnitus sound masking and Tinnitus Retraining Therapy (TRT). In addition, other factors have been suggested as being prognostic to outcome though these results are inconsistent. For example, Koizumi et al.<sup>6</sup> found better outcomes with TRT for patients with higher levels of tinnitus loudness, while Ariizumi et al.<sup>7</sup> reported lower tinnitus loudness to be predictive of better outcomes with TRT.

Using intervention with repetitive transcranial magnetic stimulation (rTMS), Kleinjung et al.<sup>2</sup> suggests that mild hearing loss and shorter duration of tinnitus are more likely to be beneficial. Graul et al.<sup>8</sup> reported that young in age and more severe depression contributed to a positive response with cognitive-behavioral therapy (CBT). Conrad et al.<sup>9</sup> suggests that dysfunctional cognition is associated with CBT outcome, i.e., more severe dysfunctional cognition results in a more negative emotional outcome after CBT intervention.

Tinnitus sound masking has been widely used as an intervention for patients with any characteristic of tinnitus<sup>10</sup>. According to the Cochrane reviewed by Hobson et al.<sup>3,4</sup>, however, no significant difference was shown in the loudness of tinnitus or the

1  
2  
3 overall severity of tinnitus following the use of sound masking therapy compared to  
4 other interventions.  
5  
6

7 To our best knowledge, there are few studies available on the factors that affect  
8 the effectiveness of sound masking therapy. Knowing the possible influencing factors  
9 on the effectiveness of sound masking intervention would be valuable to provide  
10 guidance for predicting outcomes and therapeutic strategy selection.  
11  
12

13 Evidence has shown that audiometric configuration is associated with ear  
14 pathologies. For example, noise induced hearing loss is related to the audiogram with  
15 a 3-6 kHz dip<sup>11</sup>. Understanding audiometric configurations may provide insights into  
16 the etiologic mechanism and prevalence of tinnitus<sup>12-15</sup>. For instance, in the study by  
17 Demeester et al.<sup>15</sup>, prevalence of tinnitus was found to be significantly higher in  
18 individuals with a high-frequency steeply sloping audiogram than in those with a flat  
19 audiogram. However, it is still unclear as to the influence of audiometric  
20 configurations on the effectiveness of sound masking intervention for people with  
21 tinnitus. The purpose of this study was to identify the influencing factors on tinnitus  
22 sound masking using Logistic Regression Analysis, which would contribute to predict  
23 effectiveness of intensive sound masking intervention for patients with tinnitus.  
24  
25  
26  
27  
28  
29  
30  
31  
32  
33  
34  
35  
36

## 37 **MATERIALS AND METHODS**

### 38 *Participants*

39 The present research was a retrospective study. A total of 102 patients with  
40 tinnitus who underwent audiological investigations and specific tinnitus examinations,  
41 follow by seven days sound masking intervention at the Sun Yat-sen Memorial  
42 Hospital of Sun Yat-sen University, China were selected. This study was approved by  
43 the ethics committee of Sun Yat-sen Memorial Hospital, Sun Yat-sen University.  
44  
45  
46  
47  
48  
49  
50

### 51 *Routine Audiological Examinations*

52 Routine audiological examination consisted of otoscopy, followed by pure-tone  
53 audiometry in which air conduction thresholds were measured for both ears at 125 Hz,  
54 250 Hz, 500 Hz, 1.0 kHz, 2.0 kHz, 4.0 kHz and 8.0 kHz, and bone conduction hearing  
55  
56  
57  
58  
59  
60



1  
2  
3 thresholds were measured between 250 Hz and 4.0 kHz in a sound-proof booth. On  
4  
5 the basis of the audiograms, the audiometric configurations were classified as either  
6  
7 flat, high-frequency gently sloping (HFGS), high-frequency steeply sloping (HFSS),  
8  
9 low-frequency ascending (LFA), mid-frequency U-curve (MFU) and mid-frequency  
10  
11 reversed U-curve (MFRU) in accordance with the criteria used in the study by  
12  
13 Hannula et al.(2011).

### 14 15 *Tinnitus Specific Assessments*

16  
17  
18 Tinnitus pitch and loudness matching measurements were performed in the  
19  
20 ipsilateral ear to the tinnitus. During the tinnitus test, the tone was set successively to  
21  
22 9 audiometric frequencies between 125 Hz and 8.0 kHz (i.e., 125 Hz, 250 Hz, 500 Hz,  
23  
24 1.0 kHz, 2.0 kHz, 3.0 kHz, 4.0 kHz, 6.0 kHz, and 8.0kHz). Firstly, the audiometric  
25  
26 tones were used to roughly match the tinnitus pitch. Participants were then asked  
27  
28 whether the tinnitus sounded like a pure-tone, such as the one that had just been  
29  
30 perceived during audiometry. At the end of the pitch-matching test participants were  
31  
32 asked to indicate which of the frequencies most closely matched the pitch of their  
33  
34 tinnitus until a pure-tone was found. If there was no matching with a pure tone,  
35  
36 narrow-band noise was used. When the matching frequency was found, the level was  
37  
38 initially set to 5 dB above the measured audiometric threshold to find an approximate  
39  
40 level, then the level was adjusted in 1 dB step until the subject indicated that the tone  
41  
42 matched the loudness of their tinnitus.

### 43 44 *The Sound Masking Intervention*

45  
46 Due to patient adherence in the context of Chinese culture and Healthcare system,  
47  
48 only intensive sound marking intervention was provided, and the short-term  
49  
50 effectiveness was subsequently assessed. The narrow-band noise at 10 dB above the  
51  
52 tinnitus frequency was delivered to mask the tinnitus through headphones  
53  
54 (Beyerdynamic DT880 pro) 4-6 times daily for 20-30 minutes, for a week<sup>16,17</sup>.

### 55 56 *Self-reported tinnitus issues and Tinnitus Handicap Inventory (THI) Questionnaire*

1  
2  
3 Information on the tinnitus characteristics was collected. Patients were asked to  
4 describe the tinnitus duration and laterality, being in the right, left or both ears. The  
5 effectiveness of the sound masking intervention was evaluated using the Tinnitus  
6 Handicap Inventory (THI) before and after intervention. THI is a 25-item  
7 measurement for evaluating the self-perceived level of handicap caused by tinnitus,  
8 based on a 0-100 increasing handicap scale (with 100 being total handicap and 0  
9 being no handicap)<sup>18</sup>. The significant effectiveness was defined as a minimum of 7  
10 points improvement in overall THI score after the sound masking intervention<sup>19,20</sup>.  
11  
12  
13  
14  
15  
16  
17  
18

### 19 ***Statistical Analysis***

20  
21 Continuous data were expressed as mean±standard deviation (SD) or median  
22 (interquartile range, IQR), as appropriate, and categorical data were shown as  
23 frequencies and percentages. Student's t-tests (for continuous variables), Wilcoxon  
24 Rank sum tests (for skewed distribution of continuous variables), and chi-square tests  
25 (for categorical variables) were used to assess differences in socio-demographic  
26 characteristics and tinnitus relevant factors by therapeutic efficacy (effectiveness  
27 versus non-effectiveness). A *p* level of less than 0.05 was considered statistically  
28 significant. Multivariate logistic regression models were performed to assess the  
29 independent association of socio-demographic and tinnitus relevant factors with  
30 effective therapy while controlling for each of the other factors. Odds ratio (OR) and  
31 its 95% confidence interval (CI) was estimated for each factor. *p*<0.05 (two-sided)  
32 was considered to be statistically significant. All statistical analyses were conducted  
33 using SAS software version 9.4 (SAS Institute, Inc., Cary, NC, USA).  
34  
35  
36  
37  
38  
39  
40  
41  
42  
43  
44  
45  
46  
47  
48

## 49 **RESULTS**

50  
51 On the basis of the THI score changes *pre*-and *post*-sound masking intervention  
52 (i.e., equal or greater than 7 points), fifty-one participants were entered in the effective  
53 group, whereas the remaining 51 participants were in the non-effective group. THI  
54 scores were significantly reduced in the effective group ( $t=-14.07$ ,  $p<0.001$ ), whereas  
55  
56  
57  
58  
59  
60

1  
2  
3 no significant effect ( $t=-1.98, p>0.05$ ) was found in the non-effective group when  
4 comparing THI score pre and post sound masking (Figure 1).  
5  
6

7  
8 **Please insert Figure 1 near here**  
9

10 Figure 2 shows the averaged pure tone hearing threshold across frequencies from  
11 125 Hz to 8000 Hz on tinnitus ears and non-tinnitus ears in both effective and  
12 non-effective groups. The hearing threshold of each frequency from 125 Hz to 8000  
13 Hz revealed no significant differences between the two groups in both tinnitus  
14 ( $p>0.05$ ) and non tinnitus ears ( $p>0.05$ ). Significantly higher hearing thresholds of  
15 each frequency in tinnitus ears were found in both effective ( $p<0.05$ ) and non  
16 effective groups ( $p<0.05$ ) when compared to hearing threshold in non tinnitus ears.  
17  
18  
19  
20  
21  
22

23  
24 **Please insert Figure 2 near here**  
25

26 As shown in Table 1, statistical analysis was conducted to compare various factors  
27 between effective and non-effective groups. There was no significant difference in  
28 gender distribution between effective and non-effective groups (Chi-square  
29 analysis,  $\chi^2=2.53, p=0.163$ ).  
30  
31  
32  
33  
34

35 **Please insert Table 1 near here**  
36

37 Student *t-test* showed that participants in the effective group were significantly  
38 younger than those in the non-effective group ( $t=-2.55, p=0.012$ ). Further analysis  
39 showed that median scores of THI obtained from participants in the effective group  
40 before receiving the sound masking intervention were significantly higher than those  
41 in non-effective group (THI: 54.04 vs. 37.57,  $t=4.11, p<0.001$ ).  
42  
43  
44  
45  
46

47 According to audiometric configurations classification criteria, patients in the  
48 effective group had a flat audiogram (62.75%), HFSG (17.65%) and HFSS (15.69%),  
49 whilst patients in non-effective group had flat audiogram (35.29%), HFSG (23.53%)  
50 and HFSS (31.37%) audiometric configurations, respectively. Only 7 cases had LFA,  
51 MFU or MFRU audiometric configurations, which were classified as 'others' for the  
52 purpose of analysis. Further comparison analysis indicated that significantly higher  
53  
54  
55  
56  
57  
58  
59  
60

1  
2  
3 flat audiogram configurations together with lower HFGS and HFSS audiograms were  
4 found in the effective group than in non-effective group ( $\chi^2=8.30$ ,  $df=3$ ;  
5  $p=0.04$ ). However, there were no significant differences in the tinnitus assessment  
6 results (i.e., tinnitus loudness, tinnitus pitch, tinnitus laterality, duration, sound  
7 category) between effective and non-effective groups.  
8  
9

10  
11  
12  
13 To identify predictive factors for effectiveness with sound masking intervention, a  
14 logistic regression analysis was performed. Results of the multivariable logistic  
15 regression analysis were presented in Table 2. It showed that age was negatively  
16 associated with effective treatment (OR=0.96, 95% CI: 0.93, 0.99,  $p=0.014$ ),  
17 indicating that one year younger in age would be associated with 4% increase in  
18 effectiveness of sound masking intervention; while flat audiogram configurations  
19 (OR=7.06, 95% CI: 0.95, 52.20,  $p=0.056$ ) and THI score before treatment (OR=1.08,  
20 95%CI: 1.00, 1.16,  $p=0.045$ ) were positively associated with successful treatment,  
21 indicating that participants with flat audiogram configurations were 7.06 time more  
22 likely to be successfully treated as compared to those with other audiogram  
23 configurations, and one unit increase in THI score before treatment was associated  
24 with 8% increase in therapeutic effectiveness.  
25  
26  
27  
28  
29  
30  
31  
32  
33  
34  
35  
36

37 **Please insert Table 2 near here**

## 38 **Discussion**

39  
40  
41 The data obtained from the present study demonstrate that certain factors can be  
42 prognostic for the effectiveness of intensive sound masking intervention. According  
43 to logistic regression analysis, age, audiogram configuration and THI scores prior to  
44 treatment were significantly related to the effectiveness of sound masking treatment,  
45 i.e., patients with flat audiogram, younger in age, as well as higher scores of THI were  
46 more likely to have positive outcomes. These findings explicit the importance of  
47 individual factors, which may provide useful indicators for predicting likelihood of  
48 the therapeutic effectiveness.  
49  
50  
51  
52  
53  
54  
55  
56  
57  
58  
59  
60

1  
2  
3 In the present study, participants with flat audiogram were more likely to respond  
4 positively to intensive sound masking intervention compared with those with a HFSS  
5 or HFSS audiogram but unrelated to average hearing threshold. Even though no  
6 previous study investigated the influence of audiometric configuration on the outcome  
7 of tinnitus intervention, the study by Chang et al.<sup>21</sup> showed that patients with a flat  
8 pattern audiogram benefited more from hearing aids compared to those with rising or  
9 decreasing audiogram in terms of improvement of psychological handicap and quality  
10 of life. Therefore, audiometric configuration appears an important factor rather than  
11 hearing thresholds when assessing people with hearing disorders.  
12  
13  
14  
15  
16  
17  
18  
19

20  
21 Furthermore, higher THI scores before treatment were correlated with a better  
22 response to sound masking. These results are consistent with the findings of Koizumi  
23 et al.<sup>6</sup> and Theodoroff et al.<sup>1</sup>, who found tinnitus retraining therapy (TRT) more  
24 effective in patients with higher THI scores. Koizumi et al.<sup>6</sup> further suggested that  
25 TRT should be introduced to tinnitus patients with THI score higher than 50 points.  
26 Because overall THI score may reflect the distress in tinnitus patients, these results  
27 suggested that sound masking may be regarded as a useful therapy to alleviate the  
28 distress cause by tinnitus, particularly in patients in severe distress<sup>22</sup>. Recent  
29 magnetoencephalography (MEG) data reported by Adjamian et al.,<sup>23</sup> support the  
30 efficacy of sound masking on psychological handicap (depression and anxiety),  
31 reflecting a reduction in delta band activity, which is considered a possible neuronal  
32 marker for the effect of masking<sup>10</sup>.  
33  
34  
35  
36  
37  
38  
39  
40  
41  
42  
43

44 In addition, younger age had a positive effect on the benefits of sound masking.  
45 Von Wedel et al.<sup>24</sup> suggested that younger tinnitus patients are more likely to report  
46 distress and tinnitus annoyance than older patients. Moreover, Seydel et al.<sup>25</sup>  
47 demonstrated that young tinnitus subjects suffered distress more severely than older  
48 tinnitus subjects. It indicates that young tinnitus subjects are more likely to have a  
49 greater need for alleviating the distress by using sound masking intervention.  
50  
51  
52  
53  
54  
55  
56  
57  
58  
59  
60

1  
2  
3 It is noteworthy that influencing factors associated with only short-term  
4 effectiveness after intensive sound masking therapy was investigated due to patient  
5 adherence issue. Future prospective longitudinal research is needed to explore the  
6 long-term effectiveness of sound masking therapy, together with its associated  
7 influencing factors.  
8  
9  
10  
11  
12

### 13 **Conclusion**

14  
15  
16 This retrospective study suggests that flat audiogram, younger age, and high  
17 scores for THI are predictive of beneficial treatment outcomes. Gender, tinnitus  
18 laterality, duration and hearing threshold seemed not to be related to the effectiveness  
19 of intensive sound masking treatment. A future randomized control study is needed to  
20 provide further evidence for prognostic factors (e.g. audiometric configuration, age,  
21 THI score) and their contributing to the effectiveness of tinnitus interventions.  
22  
23  
24  
25  
26  
27

### 28 **Acknowledgments**

29 We would like to acknowledge Dr. Christopher Wigham for his proof reading.

30  
31 **Contributors** YXC and YQZ Contributed to the study design. HDY, JJJ, XYH and  
32 XYZ collected the data. QZ and HDY designed the plan of analysis. QZ, HX and SJC  
33 performed the final analyses. YXC, FZ, HJM and XTC drafted the manuscript and  
34 interpreted the results. All authors made substantive editorial contributions at all  
35 stages of manuscript preparation.  
36  
37  
38  
39  
40

### 41 **Funding**

42 This work was funded by National Natural Science Foundation of China (Grant No.  
43 81600808 and 81570935), Natural Science Foundation of Guangdong Province (Grant  
44 No. 2016A030313318 and 2015A030310134) and National University Student  
45 Innovation Training Scheme (Grant No. 201601133).  
46  
47  
48  
49

### 50 **Competing interest**

51 None.  
52  
53

### 54 **Data sharing statements**

55 No additional data are available. However, the original data that support the findings  
56  
57  
58  
59  
60

1  
2  
3  
4  
5  
6  
7  
8  
9  
10  
11  
12  
13  
14  
15  
16  
17  
18  
19  
20  
21  
22  
23  
24  
25  
26  
27  
28  
29  
30  
31  
32  
33  
34  
35  
36  
37  
38  
39  
40  
41  
42  
43  
44  
45  
46  
47  
48  
49  
50  
51  
52  
53  
54  
55  
56  
57  
58  
59  
60

derived from this study can be requested by emailing [yiqingzheng@hotmail.com](mailto:yiqingzheng@hotmail.com)

For peer review only

## References

1. Theodoroff SM, Schuette A, Griest S, Henry JA. Individual patient factors associated with effective tinnitus treatment. *J Am Acad Audiol* 2014;25(7):631-643.
2. Kleinjung T, Steffens T, Sand P, et al. Which tinnitus patients benefit from transcranial magnetic stimulation? *Otolaryngol Head Neck Surg* 2007;137(4):589-595.
3. Hobson J, Chisholm E, El Refaie A. Sound therapy (masking) in the management of tinnitus in adults. *Cochrane Database Syst Rev* 2012;11:D6371.
4. Hobson J, Chisholm E, El Refaie A. Sound therapy (masking) in the management of tinnitus in adults. *Cochrane Database Syst Rev* 2010(12):D6371.
5. Herraiz C, Hernandez FJ, Toledano A, Aparicio JM. Tinnitus retraining therapy: prognosis factors. *Am J Otolaryngol* 2007;28(4):225-229.
6. Koizumi T, Nishimura T, Sakaguchi T, Okamoto M, Hosoi H. Estimation of factors influencing the results of tinnitus retraining therapy. *Acta Otolaryngol Suppl* 2009(562):40-45.
7. Ariizumi Y, Hatanaka A, Kitamura K. Clinical prognostic factors for tinnitus retraining therapy with a sound generator in tinnitus patients. *J Med Dent Sci* 2010;57(1):45-53.
8. Graul J, Klinger R, Greimel KV, Rustenbach S, Nutzinger DO. Differential outcome of a multimodal cognitive-behavioral inpatient treatment for patients with chronic decompensated tinnitus. *Int Tinnitus J* 2008;14(1):73-81.
9. Conrad I, Kleinstaubler M, Jasper K, et al. The changeability and predictive value of dysfunctional cognitions in cognitive behavior therapy for chronic tinnitus. *Int J Behav Med* 2015;22(2):239-250.
10. Hoare DJ, Searchfield GD, El Refaie A, Henry JA. Sound therapy for tinnitus management: practicable options. *J Am Acad Audiol* 2014;25(1):62-75.
11. Hannula S, Bloigu R, Majamaa K, Sorri M, Maki-Torkko E. Audiogram configurations among older adults: prevalence and relation to self-reported hearing problems. *Int J Audiol* 2011;50(11):793-801.
12. Kim SY, Jeon YJ, Lee JY, Kim YH. Characteristics of tinnitus in adolescents and association with psychoemotional factors. *Laryngoscope* 2016:Oct 24.
13. Kim SI, Kim MG, Kim SS, et al. Evaluation of tinnitus patients by audiometric configuration. *Am J Otolaryngol* 2016;37(1):1-5.
14. Schecklmann M, Vielsmeier V, Steffens T, et al. Relationship between Audiometric slope and tinnitus pitch in tinnitus patients: insights into the mechanisms of tinnitus generation. *PLoS One* 2012;7(4):e34878.
15. Demeester K, van Wieringen A, Hendrickx JJ, et al. Prevalence of tinnitus and audiometric shape. *B-ENT* 2007;3 Suppl 7:37-49.
16. Teismann H, Okamoto H, Pantev C. Short and intense tailor-made notched music training against tinnitus: the tinnitus frequency matters. *PLoS One* 2011;6(9):e24685.
17. Xu Y, Zhou H, Yang D. [Clinical observation of the relationship between tinnitus



- 1  
2  
3 masking curve and masking therapy result]. *Lin Chung Er Bi Yan Hou Tou Jing*  
4 *Wai Ke Za Zhi* 2009;23(13):588-590.
- 5  
6 18. Newman CW, Jacobson GP, Spitzer JB. Development of the Tinnitus Handicap  
7 Inventory. *Arch Otolaryngol Head Neck Surg* 1996;122(2):143-148.
- 8  
9 19. Kim BJ, Chung SW, Jung JY, Suh MW. Effect of different sounds on the  
10 treatment outcome of tinnitus retraining therapy. *Clin Exp Otorhinolaryngol*  
11 2014;7(2):87-93.
- 12  
13 20. Zeman F, Koller M, Figueiredo R, et al. Tinnitus handicap inventory for  
14 evaluating treatment effects: which changes are clinically relevant? *Otolaryngol*  
15 *Head Neck Surg* 2011;145(2):282-287.
- 16  
17 21. Chang YS, Choi J, Moon IJ, et al. Factors associated with self-reported outcome  
18 in adaptation of hearing aid. *Acta Otolaryngol* 2016;136(9):905-911.
- 19  
20 22. von Wedel H, von Wedel UC, Streppel M, Walger M. [Effectiveness of partial  
21 and complete instrumental masking in chronic tinnitus. Studies with reference to  
22 retraining therapy]. *HNO* 1997;45(9):690-694.
- 23  
24 23. Adjamian P, Sereda M, Zobay O, Hall DA, Palmer AR. Neuromagnetic indicators  
25 of tinnitus and tinnitus masking in patients with and without hearing loss. *J Assoc*  
26 *Res Otolaryngol* 2012;13(5):715-731.
- 27  
28 24. von Wedel H, von Wedel UC, Zorowka P. Tinnitus diagnosis and therapy in the  
29 aged. *Acta Otolaryngol Suppl* 1990;476:195-201.
- 30  
31 25. Seydel C, Haupt H, Olze H, Szczepek AJ, Mazurek B. Gender and chronic  
32 tinnitus: differences in tinnitus-related distress depend on age and duration of  
33 tinnitus. *Ear Hear* 2013;34(5):661-672.
- 34  
35  
36  
37  
38  
39  
40  
41  
42  
43  
44  
45  
46  
47  
48  
49  
50  
51  
52  
53  
54  
55  
56  
57  
58  
59  
60

### Captions of Figures

Figure 1. (Color online) Comparison of THI scores between *pre*-and *post*-sound masking intervention in effective and non-effective groups.

*Note:*\* there was a significant difference at  $p < 0.05$ .

Figure 2. (Color online) The averaged pure tone hearing thresholds on tinnitus ears and non-tinnitus ears in both effective and non-effective groups.

For peer review only

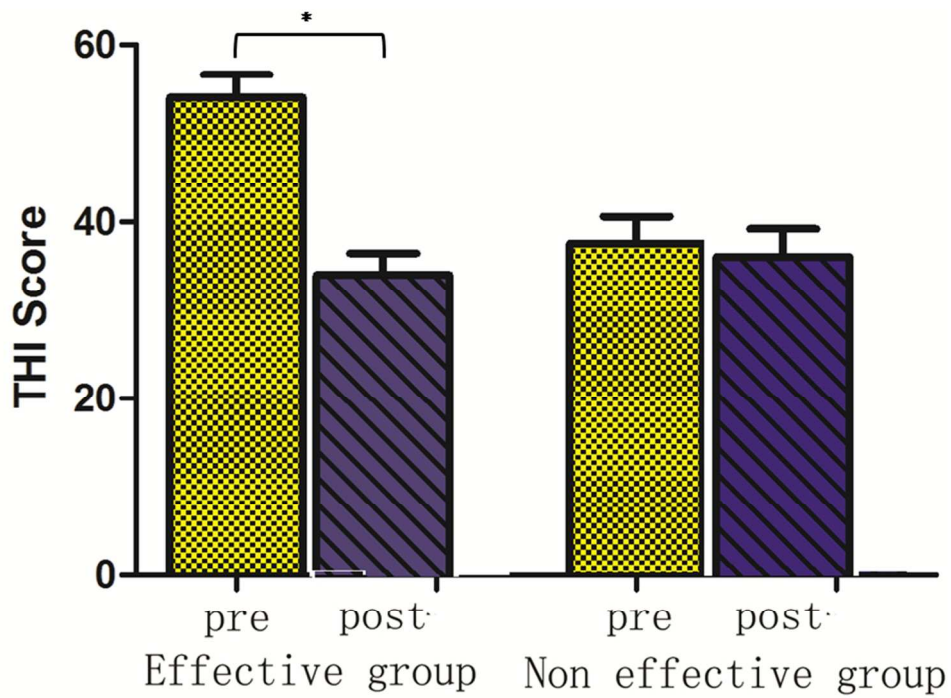

Figure 1. (Color online) Comparison of THI scores between pre-and post-sound masking intervention in effective and non-effective groups.

254x190mm (96 x 96 DPI)

Peer Review Only

Figure 1

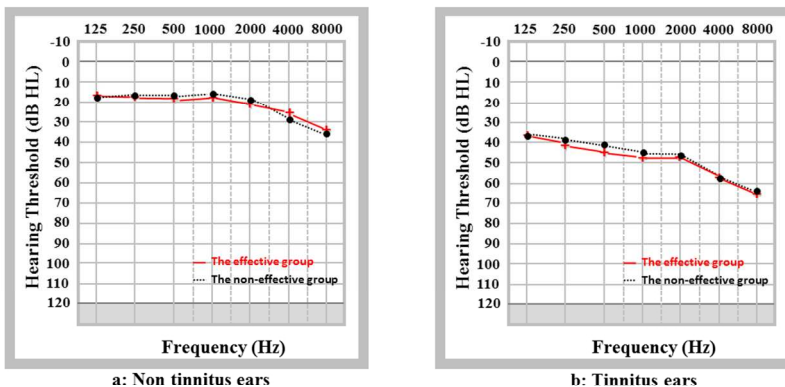

Figure 2. (Color online) The averaged pure tone hearing thresholds on tinnitus ears and non-tinnitus ears in both effective and non-effective groups.

338x190mm (96 x 96 DPI)

Review only

Table 1. Socio-demographic characteristics of patients by therapeutic outcome

| Variables                      | Total<br>(n=102) | Effectiveness<br>(n=51) | Ineffectiveness<br>(n=51) | Chi-square/<br>t | P value           |
|--------------------------------|------------------|-------------------------|---------------------------|------------------|-------------------|
| Gender (n,%)                   |                  |                         |                           | 2.53             | 0.163             |
| Male                           | 46(45.1%)        | 19(37.3%)               | 27(52.9%)                 |                  |                   |
| Female                         | 56(54.9%)        | 32(62.7%)               | 24(47.1%)                 |                  |                   |
| Age (years, mean±SD)           | 44.98 ± 15.41    | 41.20 ± 15.41           | 48.76 ± 14.58             | -2.55            | <b>0.012*</b>     |
| Tinnitus loudness              | 61.23 ± 23.42    | 61.10 ± 24.71           | 61.35 ± 22.30             | -0.06            | 0.96              |
| Tinnitus pitch (n,%)           |                  |                         |                           | 4.29             | 0.12              |
| [250-1000) Hz                  | 17(16.67%)       | 6(11.76%)               | 11(21.57%)                |                  |                   |
| [1000-4000) Hz                 | 24(23.53%)       | 16(31.37%)              | 8(15.69%)                 |                  |                   |
| [4000-8000] Hz                 | 61(59.80%)       | 29(56.87%)              | 32(62.74%)                |                  |                   |
| Laterality (n,%)               |                  |                         |                           | 0.00             | 1.00              |
| Left                           | 54(52.94%)       | 27(52.94%)              | 27(52.94%)                |                  |                   |
| Right                          | 36(35.29%)       | 18(35.29%)              | 18(35.29%)                |                  |                   |
| Binaural                       | 12(11.77%)       | 6(11.77%)               | 6(11.77%)                 |                  |                   |
| Duration (n,%)                 |                  |                         |                           | 0.82             | 0.66              |
| Acute (<1 month)               | 68(66.66%)       | 32(62.75%)              | 36(70.59%)                |                  |                   |
| Subacute (1-3 month)           | 17(16.67%)       | 10(19.61%)              | 7(13.73%)                 |                  |                   |
| Chronic (>1 month)             | 17(16.67%)       | 9(17.64%)               | 8(15.68%)                 |                  |                   |
| Audiogram configurations (n,%) |                  |                         |                           | 8.30             | <b>0.04*</b>      |
| Flat                           | 50(49.02%)       | 32(62.75%)              | 18(35.29%)                |                  |                   |
| HFGS                           | 21(20.59%)       | 9(17.65%)               | 12(23.53%)                |                  |                   |
| HFSS                           | 24(23.63%)       | 8(15.69%)               | 16(31.37%)                |                  |                   |
| Others                         | 7(6.76%)         | 2(3.91%)                | 5(9.81%)                  |                  |                   |
| Sound category (n,%)           |                  |                         |                           | 1.96             | 0.16              |
| Pure tone                      | 78(74.29%)       | 42(82.35%)              | 36(70.59%)                |                  |                   |
| Noise                          | 24(25.71%)       | 9(17.65%)               | 15(29.41%)                |                  |                   |
| Hearing threshold              | 53.75 ± 27.66    | 52.51 ± 26.94           | 54.98 ± 28.57             | -0.45            | 0.65              |
| Prior treatment THI            | 45.80 ± 21.76    | 54.04 ± 18.45           | 37.57 ± 21.86             | 4.11             | <b>&lt;0.001*</b> |

Notes: \* $p < 0.05$ ; Continuous variables were expressed as Median ± SD. T tests, or chi-square tests were used to do group comparisons, as appropriate; THI: Tinnitus Handicap Inventory; HFGS: high-frequency gently sloping; HFSS: high-frequency steeply sloping.

Table 2. Association of socio-demographic factors and audiogram configurations with effective therapy: multivariate logistic regression analysis

| Variables                | <i>B</i>  | <i>SE</i> | <i>Wald</i> | <i>P</i> value | <i>OR</i> | 95% <i>CI</i> |       |
|--------------------------|-----------|-----------|-------------|----------------|-----------|---------------|-------|
|                          |           |           |             |                |           | Lower         | Upper |
| Age (year)               | -0.04     | 0.17      | 6.10        | <b>0.014**</b> | 0.96      | 0.93          | 0.99  |
| Audiogram configurations |           | 9.82      |             | <b>0.020**</b> |           |               |       |
| Flat                     | 1.95      | 1.02      | 3.66        | <b>0.056*</b>  | 7.06      | 0.95          | 52.20 |
| HFSS                     | 0.99      | 1.08      | 0.86        | 0.35           | 2.71      | 0.33          | 22.30 |
| HFSS                     | 0.18      | 1.04      | 0.03        | 0.86           | 1.20      | 0.16          | 9.29  |
| Others                   | reference |           |             |                | 1.00      |               |       |
| Prior treatment THI      | 0.08      | 0.04      | 4.01        | <b>0.045**</b> | 1.08      | 1.00          | 1.16  |
| Hearing threshold        | -0.01     | 0.01      | 0.42        | 0.52           | 0.99      | 0.98          | 1.01  |

Notes: \* $p < 0.1$ , \*\* $p < 0.05$ ; OR:Odds Ratio; 95%CI: 95% Confidence Interval.

# BMJ Open

## Logistic Regression Analysis of the Influencing Factors Associated with Effectiveness of Intensive Sound Masking Therapy in Patients with Tinnitus

|                                 |                                                                                                                                                                                                                                                                                                                                                                                                                                                                                                                                                                                                                                                                                                                                                                                                                                                                                                                                                                                                     |
|---------------------------------|-----------------------------------------------------------------------------------------------------------------------------------------------------------------------------------------------------------------------------------------------------------------------------------------------------------------------------------------------------------------------------------------------------------------------------------------------------------------------------------------------------------------------------------------------------------------------------------------------------------------------------------------------------------------------------------------------------------------------------------------------------------------------------------------------------------------------------------------------------------------------------------------------------------------------------------------------------------------------------------------------------|
| Journal:                        | <i>BMJ Open</i>                                                                                                                                                                                                                                                                                                                                                                                                                                                                                                                                                                                                                                                                                                                                                                                                                                                                                                                                                                                     |
| Manuscript ID                   | bmjopen-2017-018050.R1                                                                                                                                                                                                                                                                                                                                                                                                                                                                                                                                                                                                                                                                                                                                                                                                                                                                                                                                                                              |
| Article Type:                   | Research                                                                                                                                                                                                                                                                                                                                                                                                                                                                                                                                                                                                                                                                                                                                                                                                                                                                                                                                                                                            |
| Date Submitted by the Author:   | 19-Sep-2017                                                                                                                                                                                                                                                                                                                                                                                                                                                                                                                                                                                                                                                                                                                                                                                                                                                                                                                                                                                         |
| Complete List of Authors:       | Cai, Yuexin; Sun Yat-Sen Memorial Hospital, Department of Otolaryngology<br>Zhou, Qian; Institute of Hearing and Speech-Language Science, Sun Yat-sen University<br>Yang, Haidi; Sun Yat-Sen Memorial Hospital, Department of Otolaryngology<br>Jiang, Jiajia; Sun Yat-Sen Memorial Hospital, Department of Otolaryngology<br>Zhao, Fei; Cardiff Metropolitan University, 2. Department of Speech Language Therapy and Hearing Science<br>Huang, Xiayin; Sun Yat-Sen Memorial Hospital, Department of Otolaryngology<br>Mo, Hanjie; Sun Yat-Sen Memorial Hospital, Department of Otolaryngology<br>Chen, Xiaoting; Sun Yat-Sen Memorial Hospital, Department of Otolaryngology<br>Xiong, Hao; Sun Yat-Sen Memorial Hospital, Department of Otolaryngology<br>Chen, Suijun; Sun Yat-Sen Memorial Hospital, Department of Otolaryngology<br>Zhang, Xueyuan; Sun Yat-Sen Memorial Hospital, Department of Otolaryngology<br>zheng, yiqing; Sun Yat-Sen Memorial Hospital, Department of Otolaryngology |
| <b>Primary Subject Heading</b>: | Ear, nose and throat/otolaryngology                                                                                                                                                                                                                                                                                                                                                                                                                                                                                                                                                                                                                                                                                                                                                                                                                                                                                                                                                                 |
| Secondary Subject Heading:      | Ear, nose and throat/otolaryngology                                                                                                                                                                                                                                                                                                                                                                                                                                                                                                                                                                                                                                                                                                                                                                                                                                                                                                                                                                 |
| Keywords:                       | Sound Masking, Tinnitus, Audiometric Configuration, Prognostic Factors                                                                                                                                                                                                                                                                                                                                                                                                                                                                                                                                                                                                                                                                                                                                                                                                                                                                                                                              |
|                                 |                                                                                                                                                                                                                                                                                                                                                                                                                                                                                                                                                                                                                                                                                                                                                                                                                                                                                                                                                                                                     |

SCHOLARONE™  
Manuscripts

1  
2  
3  
4  
5  
6  
7  
8  
9  
10  
11  
12  
13  
14  
15  
16  
17  
18  
19  
20  
21  
22  
23  
24  
25  
26  
27  
28  
29  
30  
31  
32  
33  
34  
35  
36  
37  
38  
39  
40  
41  
42  
43  
44  
45  
46  
47  
48  
49  
50  
51  
52  
53  
54  
55  
56  
57  
58  
59  
60

**Logistic Regression Analysis of the Influencing Factors Associated with  
Effectiveness of Intensive Sound Masking Therapy in Patients with Tinnitus**

Yuexin Cai<sup>1,2,\*</sup>, Qian Zhou<sup>3,\*</sup>, Haidi Yang<sup>1,2</sup>, Jiajia Jiang<sup>1,2</sup>, Fei Zhao<sup>4,5</sup>, Xiayin Huang<sup>1,2</sup>, Hanjie Mo<sup>1,2</sup>, Xiaoting Chen<sup>1,2</sup>, Hao Xiong<sup>1,2</sup>, Suijun Chen<sup>1,2</sup>, Xueyuan Zhang<sup>1,2</sup>, Yiqing Zheng<sup>1,2,a</sup>

<sup>1</sup>Department of Otolaryngology, Sun Yat-sen Memorial Hospital, Sun Yat-sen University, Guangzhou City, Guangdong Province, China

<sup>2</sup>Institute of Hearing and Speech-Language Science, Sun Yat-sen University, Guangzhou City, Guangdong Province, China

<sup>3</sup>Clinical research center, The First Affiliated Hospital, Sun Yat-sen University.

<sup>4</sup>Department of Speech Language Therapy and Hearing Science, Cardiff Metropolitan University, Cardiff, Wales.

<sup>5</sup>Department of Hearing and Speech Science, Xinhua College, Sun Yat-Sen University, Guangzhou, China.

\*Yuexin Cai and Qian Zhou contributed equally to this work.

<sup>a</sup>Author to whom correspondence should be addressed;

Electronic mail: yiqingzheng@hotmail.com

Phone number: +86 (0) 02081332115

Fax number: +86 (0) 02081332115

**Abstract**

**Objectives:** Investigate influencing factors of intensive sound masking therapy on tinnitus using Logistic Regression Analysis.

**Design:** The study used a retrospective cross-section analysis.

**Participants:** A total of 102 patients with tinnitus were recruited at the Sun Yat-sen Memorial Hospital of Sun Yat-sen University, China.

**Intervention:** Intensive sound masking therapy was used as an intervention approach for patients with tinnitus.

**Primary and secondary outcome measures:** All participants underwent audiological investigations and tinnitus pitch and loudness matching measurements, follow by intensive sound masking intervention. The Tinnitus Handicap Inventory (THI) was



1  
2  
3 used as the outcome measurement pre- and post-treatment. Multivariate logistic  
4 regression was performed to investigate association of demographic and audiological  
5 factors with effective therapy.  
6  
7

8  
9 **Results:** According to the THI score changes *pre*-and *post*-sound masking  
10 intervention, fifty-one participants were entered in the effective group, whereas the  
11 remaining 51 participants were in the non-effective group. Participants in the effective  
12 group were significantly younger than those in the non-effective group. In addition,  
13 significantly more participants had flat audiogram configurations in the effective  
14 group than in non-effective group. Multivariable logistic regression analysis showed  
15 that age, audiometric configuration and THI score pre-treatment were significantly  
16 associated with therapeutic effectiveness. Further analysis showed that patients with  
17 flat audiometric configurations were 5.45 times more likely to be successfully  
18 intervention than those with high-frequency steeply sloping audiograms.  
19  
20

21  
22 **Conclusion:** Audiometric configuration, age and THI scores before treatment appear  
23 the predictive factors for having significant effective outcomes of sound masking  
24 treatment, but gender, tinnitus characteristics and hearing threshold are not related to  
25 the effectiveness of intensive sound masking treatment. Future randomized control  
26 study is needed to provide further evidence for prognostic factors to the effectiveness  
27 of tinnitus interventions.  
28  
29

30  
31 **Key Words:**

32 Sound Masking; Tinnitus; Audiometric Configuration; Prognostic Factors  
33  
34  
35  
36  
37  
38  
39  
40  
41  
42  
43  
44  
45  
46  
47  
48  
49  
50  
51  
52  
53  
54  
55  
56  
57  
58  
59  
60

## ARTICLE SUMMARY

### Article focus

1. Are there any influencing factors associated with short-term effectiveness after intensive sound masking therapy in patients with tinnitus?
2. If so, can these factors be used to predict effectiveness of sound masking intervention for patients with tinnitus?

### Key Messages

1. Audiometric configuration, younger age, and higher THI scores before treatment appear the predictive factors associated with significant effective outcomes of sound masking treatment.
2. Gender, tinnitus laterality, duration and hearing threshold seem not to be related to the effectiveness of intensive sound masking treatment.
3. Future randomized control study is needed to provide further evidence for prognostic factors to the effectiveness of tinnitus interventions.

### Strengths

- A relatively large sample of participants were included in the present study;
- A robust analytical method (i.e., Logistic regression) was employed to explore the predictive factors associated with significant effective outcomes of sound masking treatment.

### Limitation

- Due to patient adherence in the context of Chinese culture and Healthcare system, only intensive sound masking intervention was provided, and the short-term effectiveness was subsequently assessed.

## INTRODUCTION :

Tinnitus is the perception of noise in the absence of any external sound. It is considered as one of the most common and disturbing health problems<sup>1</sup>. It is widely accepted that tinnitus is a symptom caused by diverse pathologies as a result of not only peripheral hearing loss, but also the aberrant neural activity in central auditory nervous system<sup>2-4</sup>. Subsequently various theories have been proposed to elaborate underlying possible mechanisms, such as Discordant theory (i.e., the discordant dysfunction of damaged outer hair cells and intact inner hair cells)<sup>5</sup>, and Auditory plasticity theory (damaged cochlea activates auditory plasticity by enhancing neural activity in the central auditory pathway, which results in abnormal input to the central auditory system)<sup>4</sup>.

Epidemiological studies indicate that one third of all adults report experiencing tinnitus at some time in their lives and 10 to 15% have prolonged tinnitus requiring medical interventions<sup>6</sup>. At present, a number of interventions are available for tinnitus management within ENT/Audiology clinics, mainly including pharmacotherapy, cognitive behavioral therapy (CBT), habituation therapy (Tinnitus retraining therapy, TRT), electrical suppression (e.g., repetitive transcranial magnetic stimulation r-TMS) and sound therapy (e.g., sound masking). Of these, tinnitus sound masking therapy has been widely used as an intervention for patients with any characteristic of tinnitus<sup>7</sup>. According to the Cochrane reviewed by Hobson et al.<sup>8, 9</sup>, however, no significant difference was shown in the loudness of tinnitus or the overall severity of tinnitus following the use of sound masking therapy compared to other interventions.

Furthermore, evidence has shown that no single treatment for tinnitus is found effective in all patients with tinnitus<sup>8, 9</sup>. These discrepancies in terms of effectiveness are largely due to the complex mechanisms behind the symptoms as indicated above and the severity of impact on sufferers. Previous studies suggest that there are many influencing factors such as age, tinnitus characteristics and hearing status, along with other demographic factors, which affect effectiveness of tinnitus management<sup>1, 10</sup>. However, the results appear inconsistent. For example, Koizumi et al.<sup>11</sup> found better

1  
2  
3 outcomes with TRT for patients with higher levels of tinnitus loudness, while  
4 Ariizumi et al.<sup>12</sup> reported lower tinnitus loudness to be predictive of better outcomes  
5 with TRT.  
6  
7

8  
9 In addition, Kleinjung et al.<sup>6</sup> suggests that mild hearing loss and shorter duration  
10 of tinnitus are more likely to being beneficial using rTMS. These results are generally  
11 in keeping with influencing factors obtained from using sound masking therapy<sup>1</sup>. It is  
12 also noteworthy that young in age and more severe depression contributed to a  
13 positive response with CBT<sup>13</sup>. Conrad et al.<sup>14</sup> further clarifies that dysfunctional  
14 cognition is associated with CBT outcome, i.e., more severe dysfunctional cognition  
15 results in a more negative emotional outcome after CBT intervention.  
16  
17  
18  
19  
20  
21

22 To our best knowledge, there are few studies available on the factors that affect  
23 the effectiveness of sound masking therapy. A recent study by Theodoroff et al.<sup>1</sup>  
24 appears the only report directly investigating the factors associated with effective  
25 tinnitus treatment using sound masking therapy<sup>1</sup>. Although they found several  
26 positive predictors, such as younger age, better self-reported hearing difficulty,  
27 shorter durations of tinnitus and better hearing threshold at low frequency region,  
28 these results were obtained by combining tinnitus treatment data of either using sound  
29 masking therapy or TRT. The separate analysis showed that participants with younger  
30 age perceived significantly better response to intervention only in TRT group  
31 ( $p < 0.017$ ), but age was not a significant factor in the group using sound masking  
32 therapy ( $p = 0.143$ ). Such bias indicated that further investigation is needed to clarify  
33 possible factors associated with effective sound masking therapy.  
34  
35  
36  
37  
38  
39  
40  
41  
42  
43  
44

45 Evidence has shown that audiometric configuration is associated with ear  
46 pathologies. For example, noise induced hearing loss is related to the audiogram with  
47 a 3-6 kHz dip<sup>15</sup>. Understanding audiometric configurations may provide insights into  
48 the etiologic mechanism and prevalence of tinnitus<sup>16-19</sup>. For instance, in the study by  
49 Demeester et al.<sup>19</sup>, prevalence of tinnitus was found to be significantly higher in  
50 individuals with a high-frequency steeply sloping audiogram than in those with a flat  
51 audiogram. However, it is still unclear as to the influence of audiometric  
52 configurations on the effectiveness of sound masking intervention for people with  
53  
54  
55  
56  
57  
58  
59  
60

1  
2  
3  
4  
5  
6  
7  
8  
9  
10  
11  
12  
13  
14  
15  
16  
17  
18  
19  
20  
21  
22  
23  
24  
25  
26  
27  
28  
29  
30  
31  
32  
33  
34  
35  
36  
37  
38  
39  
40  
41  
42  
43  
44  
45  
46  
47  
48  
49  
50  
51  
52  
53  
54  
55  
56  
57  
58  
59  
60

tinnitus.

The purpose of this study was to identify the influencing factors on tinnitus sound masking using Logistic Regression Analysis, which would contribute to predict effectiveness of intensive sound masking intervention for patients with tinnitus. The significant results would be valuable to provide guidance for predicting the effectiveness of sound masking intervention outcomes and thus therapeutic strategy selection.

## MATERIALS AND METHODS

### *Participants*

The present research was a retrospective study. A total of 102 patients with tinnitus who underwent audiological investigations and specific tinnitus examinations, follow by seven days sound masking intervention at the Sun Yat-sen Memorial Hospital of Sun Yat-sen University, China were initially considered. The detailed selection criteria are as follows:

- (1) They had sought clinical help for their tinnitus problem, which had lasted more than 2 weeks;
- (2) They had no history of head trauma or central nervous system disorders;
- (3) They had mild to severe sensorineural hearing loss. All tinnitus patients with either current conductive hearing loss or previous middle ear surgery (e.g., mastoidectomy) were excluded<sup>17</sup>.
- (4) The tinnitus patients with pulsatile tinnitus due to aberrant vascular malformation were also excluded.

The mean age of all participants was 44.98 years (SD: 15.41). There were 46 males and 56 females (Table 1). This study was approved by the ethics committee of Sun Yat-sen Memorial Hospital, Sun Yat-sen University.

### ***Routine Audiological Examinations***

Routine audiological examination consisted of otoscopy, followed by pure-tone audiometry in which air conduction thresholds were measured for both ears at 125 Hz, 250 Hz, 500 Hz, 1.0 kHz, 2.0 kHz, 4.0 kHz and 8.0 kHz, and bone conduction hearing thresholds were measured between 250 Hz and 4.0 kHz in a sound-proof booth. The mean hearing threshold is the average of hearing sensitivity at the frequencies of 500, 1000, 2000 and 4000 Hz.

On the basis of the audiograms, the audiometric configurations were classified as either flat, high-frequency gently sloping (HFGS), high-frequency steeply sloping (HFSS), low-frequency ascending (LFA), mid-frequency U-curve (MFU) and mid-frequency reversed U-curve (MFRU) in accordance with the criteria used in the study by Hannula et al.<sup>15</sup>.

### ***Tinnitus Specific Assessments***

Patients were asked to describe the tinnitus characteristics, including duration and laterality (i.e., being in the right, left or both ears, central in the head). Tinnitus pitch and loudness matching measurements were performed ipsilaterally to the ear with predominant or louder tinnitus if there was a difference between the two sides. However, if the tinnitus ear had severe hearing loss, the contralateral ear was tested instead<sup>20</sup>. When the tinnitus was equally loud on both sides or was localized in the head, the matching tones were given to the ear with the better hearing. Otherwise, the ear was chosen randomly if there was no difference between the acuity of the two ears.

During the tinnitus pitch matching tests, the 9 audiometric frequencies between 125 Hz and 8.0 kHz (i.e., 125 Hz, 250 Hz, 500 Hz, 1.0 kHz, 2.0 kHz, 3.0 kHz, 4.0 kHz, 6.0 kHz, and 8.0kHz) were firstly used to roughly match the tinnitus pitch. Participants were initially asked to make a clear distinction between the tinnitus pitch perception and presented matching tones, and then they reported verbally whether the matching tone needed to go higher or lower until the exact matching tone or a close

1  
2  
3 approximation to their tinnitus was obtained. The test tone was adjusted in a  
4 half-octave step. If there was no matching with a pure tone perceived by participants,  
5 narrow-band noise was used instead.  
6  
7

8  
9  
10 When the matching frequency was found, the level was initially set to 5 dB above  
11 the measured audiometric threshold to find an approximate tinnitus loudness level,  
12 then the level was adjusted in 1 dB step until the subject indicated that the tone  
13 matched the loudness of their tinnitus<sup>20</sup>.  
14  
15  
16

### 17 18 ***The Sound Masking Intervention*** 19

20  
21 Due to patient adherence in the context of Chinese culture and Healthcare system,  
22 high drop-out rate was occurred when they were provided a longer duration of sound  
23 masking intervention. Considering the nature of (i.e., a retrospective study) and main  
24 purpose of the present study, current data was obtained only from intensive sound  
25 marking intervention, and the short-term effectiveness was subsequently assessed.  
26  
27 The narrow-band noise at 10 dB above the tinnitus frequency was delivered to mask  
28 the tinnitus through headphones (Beyerdynamic DT880 pro) 4-6 times daily for 20-30  
29 minutes, for a week<sup>21, 22</sup>.  
30  
31  
32  
33  
34  
35

### 36 37 ***Self-reported tinnitus issues and Tinnitus Handicap Inventory (THI) Questionnaire*** 38

39  
40 Information on the tinnitus characteristics was collected. Patients were asked to  
41 describe the tinnitus duration and laterality, being in the right, left or both ears.  
42  
43 According to the tinnitus sound masking therapy protocol, the effectiveness of the  
44 sound masking intervention was evaluated using the Tinnitus Handicap Inventory  
45 (THI) pre and post intervention, i.e., THI questionnaire was provided to investigate  
46 their tinnitus issues before the treatment initially, and this procedure was conducted  
47 again seven days after sound masking therapy at tinnitus review clinics. THI is a  
48 25-item measurement for evaluating the self-perceived level of handicap caused by  
49 tinnitus, based on a 0-100 increasing handicap scale (with 100 being total handicap  
50 and 0 being no handicap)<sup>23</sup>. The significant effectiveness was defined as a minimum  
51  
52  
53  
54  
55  
56  
57  
58  
59  
60

1  
2  
3 of 7 points improvement in overall THI score after the sound masking intervention<sup>24</sup>,  
4  
5<sup>25</sup>.

### 7 **Statistical Analysis**

8  
9  
10 Continuous data were expressed as mean±standard deviation (SD) or median  
11 (interquartile range, IQR), as appropriate, and categorical data were shown as  
12 frequencies and percentages. Student's *t*-tests (for continuous variables), Wilcoxon  
13 Rank sum tests (for skewed distribution of continuous variables), and chi-square tests  
14 (for categorical variables) were used to assess differences in socio-demographic  
15 characteristics and tinnitus relevant factors by therapeutic efficacy (effectiveness  
16 versus non-effectiveness). Multivariate logistic regression models were performed to  
17 assess the independent association of demographic and tinnitus relevant factors with  
18 effective therapy. Odds ratio (OR) and its 95% confidence interval (CI) was estimated  
19 for each factor. A *p* level of less than <0.05 (two-sided) was considered to be  
20 statistically significant. All statistical analyses were conducted using SAS software  
21 version 9.4 (SAS Institute, Inc., Cary, NC, USA).  
22  
23  
24  
25  
26  
27  
28  
29  
30  
31  
32  
33  
34  
35

### 36 **RESULTS**

37  
38 On the basis of the THI score changes *pre*-and *post*-sound masking intervention  
39 (i.e., equal or greater than 7 points), fifty-one participants were entered in the  
40 effective group, whereas the remaining 51 participants were in the non-effective  
41 group. Table 1 shows comparisons of related factors between effective and ineffective  
42 groups, respectively. In the present study, age and gender factors were compared  
43 between the effective group and the non-effective group using Student *t*-test and  
44 Chi-square test, respectively. Student *t*-test showed that participants in the effective  
45 group were significantly younger than those in the non-effective group ( $t=-2.55$ ,  
46  $p=0.012$ ). However, there was no significant difference in gender between these two  
47 groups ( $\chi^2=2.53$ ,  $df=1$ ,  $p=0.163$ ).  
48  
49  
50  
51  
52  
53  
54  
55  
56

57 **Please insert Table 1 near here**



1  
2  
3  
4  
5  
6  
7  
8  
9  
10  
11  
12  
13  
14  
15  
16  
17  
18  
19  
20  
21  
22  
23  
24  
25  
26  
27  
28  
29  
30  
31  
32  
33  
34  
35  
36  
37  
38  
39  
40  
41  
42  
43  
44  
45  
46  
47  
48  
49  
50  
51  
52  
53  
54  
55  
56  
57  
58  
59  
60

For the purpose of understanding the basic hearing status, the averaged pure tone hearing thresholds across frequencies from 125 Hz to 8000 Hz on tinnitus ears and non-tinnitus ears were analyzed in both effective and non-effective groups. As shown in Figure 1, the hearing threshold of each frequency from 125 Hz to 8000 Hz revealed no significant differences between the two groups in both tinnitus ( $p>0.05$ ) and non-tinnitus ears ( $p>0.05$ ). Significantly worse hearing threshold at each frequency in tinnitus ears were found in both effective ( $p<0.05$ ) and non-effective groups ( $p<0.05$ ) when compared to hearing threshold in non-tinnitus ears.

**Please insert Figure 1 near here**

According to audiometric configurations classification criteria, patients in the effective group had a flat audiogram (62.75%), HFGS (17.65%) and HFSS (15.69%), whilst patients in non-effective group had flat audiogram (35.29%), HFGS (23.53%) and HFSS (31.37%) audiometric configurations, respectively. Only 7 cases had LFA, MFU or MFRU audiometric configurations, which were classified as 'others' for the purpose of analysis. Further comparison analysis indicated that significantly higher flat audiogram configurations together with lower HFGS and HFSS audiograms were found in the effective group than in non-effective group ( $\chi^2=8.30$ ,  $df=3$ ;  $p=0.04$ ) (Table 1). Further analysis of tinnitus characteristics in terms of tinnitus laterality, duration, together with tinnitus pitch and loudness, there were no significant differences in these factors between effective and non-effective groups.

Furthermore, as shown in Table 1, the THI score of pre-sound masking intervention was used as baseline measurement. The averaged THI scores of pre-sound masking intervention were 54.04 (SD=18.45) and 37.57 (SD=21.86) for the effective and non-effective groups, respectively. Significantly lower THI score of pre-sound masking intervention was found in the non-effective group than that in the effective group ( $t=4.11$ ,  $p<0.001$ ). However, there was no significant difference in the THI score of post-sound masking intervention between two groups. As a result, significant difference of the THI score changes between pre and post treatments was found when comparing two groups (19.10 vs. 0.98,  $t=12.54$ ,  $p<0.001$ ). Further

1  
2  
3 analysis showed that THI scores were significantly reduced in the effective group  
4  
5 ( $t=-14.07$ ,  $p<0.001$ ), whereas no significant reduction in the THI scores was found in  
6  
7 the non-effective group in comparison of THI score between pre- and post- sound  
8  
9 masking ( $t=-1.98$ ,  $p=0.054$ ).

10  
11 To identify predictive factors for effectiveness with sound masking intervention,  
12  
13 all factors that showed significantly between both effective and non-effective groups  
14  
15 were used as variables for a logistic regression analysis. Because audiometric  
16  
17 configuration variable was categorised as four sub-groups, estimates of pair  
18  
19 comparisons were subsequently performed. Results of the multivariable logistic  
20  
21 regression analysis were summarised in Table 2. Age factor was negatively associated  
22  
23 with effective treatment (OR=0.96, 95% CI: 0.93, 0.99,  $p=0.007$ ), indicating that one  
24  
25 year older in age would be associated with 4% decrease in the effectiveness of sound  
26  
27 masking intervention. Audiometric configuration factor was also found to be an  
28  
29 independent factor associated with the effectiveness of the sound masking treatment  
30  
31 ( $p=0.027$ ). Further analysis showed that tinnitus patients with flat audiometric  
32  
33 configuration was 5.45 times more likely to be successfully intervention when  
34  
35 compared to those with HFSS configurations (OR=5.45, 95% CI: 1.67, 17.86,  
36  
37  $p=0.005$ ). However, no significant results were found when conducting the pair  
38  
39 comparisons of other audiometric configurations. In addition, THI score pre-treatment  
40  
41 was positively associated with successful treatment (OR=1.04, 95%CI: 1.02, 1.07,  
42  
43  $p<0.001$ ), indicating that one unit increase in THI score before treatment was  
44  
45 associated with 4% increase in therapeutic effectiveness.

46  
47 **Please insert Table 2 near here**

## 48 **Discussion**

49  
50 The data obtained from the present study demonstrate that certain factors can be  
51  
52 prognostic for the effectiveness of intensive sound masking intervention. According  
53  
54 to logistic regression analysis, age, audiogram configuration and THI scores prior to  
55  
56 treatment were significantly related to the effectiveness of sound masking therapy,  
57  
58  
59  
60

1  
2  
3 i.e., patients with flat audiogram, younger in age, as well as higher scores of THI were  
4 more likely to have positive outcomes. These findings explicit the importance of  
5 individual factors, which may provide useful indicators for predicting likelihood of  
6 the therapeutic effectiveness.  
7  
8  
9

10  
11 In the present study, participants with flat audiogram were more likely to respond  
12 positively to intensive sound masking intervention compared with those with a HFSS  
13 audiogram but unrelated to average hearing threshold. To our best knowledge, no  
14 previous study investigated the influence of audiometric configuration on the outcome  
15 of tinnitus intervention, even though the study by Chang et al.<sup>26</sup> showed that patients  
16 with a flat pattern audiogram benefited more from hearing aids compared to those  
17 with rising or decreasing audiogram in terms of improvement of psychological  
18 handicap and quality of life. The present result is likely due to tinnitus characteristics  
19 together with their associated hearing status. By recording Transient Otoacoustic  
20 Emissions (TEOAEs), Kim et al.<sup>17</sup> found that normal TEOAE rates were significantly  
21 higher in tinnitus patients with flat audiogram than those in the HFSS and HFSS  
22 groups. Moreover, tinnitus patients with HFSS had significantly lower response rates  
23 of TEOAEs at 3, 4 and 6 kHz than tinnitus patients with flat audiogram. Therefore,  
24 better hearing status in tinnitus patients with flat audiogram may be underlying factor,  
25 which is consistent with the previous finding reported by Theodoroff et al.<sup>1</sup>. However,  
26 this result should be interpreted with cautious due to the retrospective nature of this  
27 study. The further prospective research is needed using systematic approaches, such  
28 as randomized controlled trial<sup>27</sup>.  
29  
30  
31  
32  
33  
34  
35  
36  
37  
38  
39  
40  
41  
42  
43  
44  
45

46 Furthermore, higher THI scores before treatment were correlated with a better  
47 response to sound masking. These results are consistent with the findings of Koizumi  
48 et al.<sup>11</sup> and Theodoroff et al.<sup>1</sup>, who found tinnitus retraining therapy (TRT) more  
49 effective in patients with higher THI scores. Koizumi et al.<sup>11</sup> further suggested that  
50 TRT should be introduced to tinnitus patients with THI score higher than 50 points.  
51 Because overall THI score may reflect the distress in tinnitus patients, these results  
52  
53  
54  
55  
56  
57  
58  
59  
60

1  
2  
3 suggested that sound masking may be regarded as a useful therapy to alleviate the  
4 distress cause by tinnitus, particularly in patients in severe distress<sup>28</sup>.  
5  
6

7  
8 There are several possible mechanisms behind sound masking therapy, but the  
9 exact mechanism is still unclear. Overall, it is generally accepted that there is a  
10 reduction of a response to a signal due to the presence of another. The  
11 neuro-physiological mechanism can be explained that the original neural activity  
12 caused by the first sound signal (tinnitus) is reduced by the neural activity of the other  
13 sound (e.g., masking noise). For example, recent magnetoencephalography (MEG)  
14 data reported by Adjamian et al.,<sup>29</sup> support the efficacy of sound masking on  
15 psychological handicap (depression and anxiety), reflecting a reduction in delta band  
16 activity, which is considered a possible neuronal marker for the effect of masking<sup>7</sup>.  
17  
18  
19  
20  
21  
22  
23  
24

25  
26 Various advanced neuroimaging techniques such as fMRI and PET appeared a  
27 valuable tool to explore the mechanism of tinnitus. For example, Lanting et al.<sup>30</sup>  
28 suggested that tinnitus may correspond to enhance neural activity across several areas  
29 of the central auditory system using fMRI and PET. In the meantime, they also found  
30 that neural activities in non-auditory areas (i.e., frontal areas, limbic system and  
31 cerebellum) seem also associated with the perception of tinnitus. Therefore, further  
32 studies on the comparison of the subjective perception of tinnitus and central neural  
33 activity changes between *pre-* and *post-*sound masking therapy are needed in order to  
34 clarify the neural marker as well as the mechanisms of the effective sound masking  
35 therapy.  
36  
37  
38  
39  
40  
41  
42  
43  
44

45  
46 In the present study, younger age had a positive effect on the benefits of sound  
47 masking therapy. Von Wedel et al.<sup>31</sup> suggested that younger tinnitus patients are more  
48 likely to report distress and tinnitus annoyance than older patients. Moreover, Seydel  
49 et al.<sup>32</sup> demonstrated that younger tinnitus subjects suffered distress more severely  
50 than older tinnitus subjects, which is due to higher levels of occupational and personal  
51 stress among younger subjects<sup>32</sup>. As a result, younger subjects are likely to be more  
52 beneficial of alleviating their high level distress provided by sound masking  
53  
54  
55  
56  
57  
58  
59  
60

1  
2  
3 intervention<sup>7</sup>. In addition, the other explanation could be due to better coping  
4 capability in younger tinnitus sufferers than older subjects<sup>32</sup>  
5  
6

7  
8 It is noteworthy that influencing factors associated with only short-term  
9 effectiveness after intensive sound masking therapy was investigated due to patient  
10 adherence issue. Future prospective longitudinal research is needed to explore the  
11 long-term effectiveness of sound masking therapy, together with its associated  
12 influencing factors.  
13  
14  
15  
16  
17  
18  
19

## 20 **Conclusion**

21  
22 This retrospective study suggests that factors of audiometric configuration, age,  
23 and THI scores pre-treatment are predictive of beneficial sound masking outcomes.  
24 Further analysis indicates that tinnitus patients with flat audiogram configuration are  
25 more likely to achieve successfully intervention when compared to those with  
26 high-frequency steeply sloping audiograms. Gender, tinnitus laterality, duration and  
27 hearing threshold are not related to the effectiveness of intensive sound masking  
28 treatment. However, these results should be interpreted with caution due to the  
29 retrospective nature of this study. A future randomized control study is needed to  
30 provide further evidence for prognostic factors (e.g. audiometric configuration, age,  
31 THI score) and their contributing to the effectiveness of tinnitus interventions.  
32  
33  
34  
35  
36  
37  
38  
39  
40  
41  
42  
43  
44  
45  
46  
47  
48  
49  
50  
51  
52  
53  
54  
55  
56  
57  
58  
59  
60

**Acknowledgments**

We would like to acknowledge Dr. Christopher Wigham for his proof reading.

**Contributors** YXC and YQZ Contributed to the study design. HDY, JJJ, XYH and XYZ collected the data. QZ and HDY designed the plan of analysis. QZ, HX and SJC performed the final analyses. YXC, FZ, HJM and XTC drafted the manuscript and interpreted the results. All authors made substantive editorial contributions at all stages of manuscript preparation.

**Funding**

This work was funded by National Natural Science Foundation of China (Grant No. 81600808 and 81570935), Natural Science Foundation of Guangdong Province (Grant No. 2016A030313318 and 2015A030310134) and National University Student Innovation Training Scheme (Grant No. 201601133).

**Competing interest**

None.

**Data sharing statements**

No additional data are available. However, the original data that support the findings derived from this study can be requested by emailing [yiqingzheng@hotmail.com](mailto:yiqingzheng@hotmail.com)

## REFERENCES

- 1 Theodoroff SM, Schuette A, Griest S, *et al.*. Individual patient factors associated with effective tinnitus treatment. *J AM ACAD AUDIOL* 2014;25:631-43.
- 2 Han BI, Lee HW, Kim TY, *et al.*. Tinnitus: characteristics, causes, mechanisms, and treatments. *J CLIN NEUROL* 2009;5:11-9.
- 3 Chen YC, Wang F, Wang J, *et al.*. Resting-State Brain Abnormalities in Chronic Subjective Tinnitus: A Meta-Analysis. *FRONT HUM NEUROSCI* 2017;11:22.
- 4 Chen YC, Zhang J, Li XW, *et al.*. Aberrant spontaneous brain activity in chronic tinnitus patients revealed by resting-state functional MRI. *Neuroimage Clin* 2014;6:222-8.
- 5 Baguley D. Mechanism of tinnitus. *BRIT MED BULL* 2002;1:195-212.
- 6 Kleinjung T, Steffens T, Sand P, *et al.*. Which tinnitus patients benefit from transcranial magnetic stimulation? *Otolaryngol Head Neck Surg* 2007;137:589-95.
- 7 Hoare DJ, Searchfield GD, El RA, *et al.*. Sound therapy for tinnitus management: practicable options. *J AM ACAD AUDIOL* 2014;25:62-75.
- 8 Hobson J, Chisholm E, El RA. Sound therapy (masking) in the management of tinnitus in adults. *Cochrane Database Syst Rev* 2012;11:D6371.
- 9 Hobson J, Chisholm E, El RA. Sound therapy (masking) in the management of tinnitus in adults. *Cochrane Database Syst Rev* 2010:D6371.
- 10 Herraiz C, Hernandez FJ, Toledano A, *et al.*. Tinnitus retraining therapy: prognosis factors. *Am J Otolaryngol* 2007;28:225-9.
- 11 Koizumi T, Nishimura T, Sakaguchi T, *et al.*. Estimation of factors influencing the results of tinnitus retraining therapy. *Acta Otolaryngol Suppl* 2009:40-5.
- 12 Ariizumi Y, Hatanaka A, Kitamura K. Clinical prognostic factors for tinnitus retraining therapy with a sound generator in tinnitus patients. *J Med Dent Sci* 2010;57:45-53.
- 13 Graul J, Klinger R, Greimel KV, *et al.*. Differential outcome of a multimodal cognitive-behavioral inpatient treatment for patients with chronic decompensated tinnitus. *Int Tinnitus J* 2008;14:73-81.
- 14 Conrad I, Kleinstaubler M, Jasper K, *et al.*. The changeability and predictive value of dysfunctional cognitions in cognitive behavior therapy for chronic tinnitus. *Int J Behav Med* 2015;22:239-50.
- 15 Hannula S, Bloigu R, Majamaa K, *et al.*. Audiogram configurations among older adults: prevalence and relation to self-reported hearing problems. *INT J AUDIOL* 2011;50:793-801.
- 16 Kim SY, Jeon YJ, Lee JY, *et al.*. Characteristics of tinnitus in adolescents and association with psychoemotional factors. *LARYNGOSCOPE* 2016.
- 17 Kim SI, Kim MG, Kim SS, *et al.*. Evaluation of tinnitus patients by audiometric configuration. *Am J Otolaryngol* 2016;37:1-5.
- 18 Schecklmann M, Vielsmeier V, Steffens T, *et al.*. Relationship between Audiometric slope and tinnitus pitch in tinnitus patients: insights into the mechanisms of tinnitus generation. *PLOS ONE* 2012;7:e34878.
- 19 Demeester K, van Wieringen A, Hendrickx JJ, *et al.*. Prevalence of tinnitus and audiometric shape. *B-ENT* 2007;3 Suppl 7:37-49.

- 20 Kim TS, Yoo MH, Lee HS, *et al.*. Short-term changes in tinnitus pitch related to audiometric shape in sudden sensorineural hearing loss. *AURIS NASUS LARYNX* 2016;43:281-6.
- 21 Teismann H, Okamoto H, Pantev C. Short and intense tailor-made notched music training against tinnitus: the tinnitus frequency matters. *PLOS ONE* 2011;6:e24685.
- 22 Xu Y, Zhou H, Yang D. [Clinical observation of the relationship between tinnitus masking curve and masking therapy result]. *Lin Chung Er Bi Yan Hou Tou Jing Wai Ke Za Zhi* 2009;23:588-90.
- 23 Newman CW, Jacobson GP, Spitzer JB. Development of the Tinnitus Handicap Inventory. *Arch Otolaryngol Head Neck Surg* 1996;122:143-8.
- 24 Kim BJ, Chung SW, Jung JY, *et al.*. Effect of different sounds on the treatment outcome of tinnitus retraining therapy. *Clin Exp Otorhinolaryngol* 2014;7:87-93.
- 25 Zeman F, Koller M, Figueiredo R, *et al.*. Tinnitus handicap inventory for evaluating treatment effects: which changes are clinically relevant? *Otolaryngol Head Neck Surg* 2011;145:282-7.
- 26 Chang YS, Choi J, Moon IJ, *et al.*. Factors associated with self-reported outcome in adaptation of hearing aid. *Acta Otolaryngol* 2016;136:905-11.
- 27 Scherer RW, Formby C, Gold S, *et al.*. The Tinnitus Retraining Therapy Trial (TRTT): study protocol for a randomized controlled trial. *TRIALS* 2014;15:396.
- 28 von Wedel H, von Wedel UC, Streppel M, *et al.*. [Effectiveness of partial and complete instrumental masking in chronic tinnitus. Studies with reference to retraining therapy]. *HNO* 1997;45:690-4.
- 29 Adjamian P, Sereda M, Zobay O, *et al.*. Neuromagnetic indicators of tinnitus and tinnitus masking in patients with and without hearing loss. *J Assoc Res Otolaryngol* 2012;13:715-31.
- 30 Lanting CP, de Kleine E, van Dijk P. Neural activity underlying tinnitus generation: results from PET and fMRI. *Hear Res* 2009;255:1-13.
- 31 von Wedel H, von Wedel UC, Zorowka P. Tinnitus diagnosis and therapy in the aged. *Acta Otolaryngol Suppl* 1990;476:195-201.
- 32 Seydel C, Haupt H, Olze H, *et al.*. Gender and chronic tinnitus: differences in tinnitus-related distress depend on age and duration of tinnitus. *Ear Hear* 2013;34:661-72.



### Captions of Figures

Figure 1. (Color online) The averaged pure tone hearing thresholds on tinnitus ears and non-tinnitus ears in both effective and non-effective groups.

For peer review only

**Table 1. Comparison of demographic and audiological characteristics between the effective and non-effective groups in tinnitus patients with sound masking intervention**

| Variable                                      | Total<br>(n=102) | Effective<br>Group (n=51) | Non-effective<br>Group (n=51) | Chi-square/<br>t-test | p value           |
|-----------------------------------------------|------------------|---------------------------|-------------------------------|-----------------------|-------------------|
| <b>Demographic characteristics</b>            |                  |                           |                               |                       |                   |
| Age (years, Mean±SD)                          | 44.98 ± 15.41    | 41.20 ± 15.41             | 48.76 ± 14.58                 | -2.55                 | <b>0.012*</b>     |
| Gender (n, %)                                 |                  |                           |                               | 2.53                  | 0.163             |
| <i>Male</i>                                   | 46 (45.1%)       | 19 (37.3%)                | 27 (52.9%)                    |                       |                   |
| <i>Female</i>                                 | 56 (54.9%)       | 32 (62.7%)                | 24 (47.1%)                    |                       |                   |
| <b>Hearing status</b>                         |                  |                           |                               |                       |                   |
| Hearing threshold in<br>tinnitus ears (dB HL) | 53.75 ± 27.66    | 52.51 ± 26.94             | 54.98 ± 28.57                 | -0.45                 | 0.65              |
| Audiogram configurations (n, %)               |                  |                           |                               | 8.30                  | <b>0.04*</b>      |
| <i>Flat</i>                                   | 50 (49.02%)      | 32 (62.75%)               | 18 (35.29%)                   |                       |                   |
| <i>HFGS</i>                                   | 21 (20.59%)      | 9 (17.65%)                | 12 (23.53%)                   |                       |                   |
| <i>HFSS</i>                                   | 24 (23.63%)      | 8 (15.69%)                | 16 (31.37%)                   |                       |                   |
| <i>Others</i>                                 | 7 (6.76%)        | 2 (3.91%)                 | 5 (9.81%)                     |                       |                   |
| <b>Tinnitus characteristics</b>               |                  |                           |                               |                       |                   |
| Laterality (n, %)                             |                  |                           |                               | 0.00                  | 1.00              |
| <i>Left</i>                                   | 54 (52.94%)      | 27 (52.94%)               | 27 (52.94%)                   |                       |                   |
| <i>Right</i>                                  | 36 (35.29%)      | 18 (35.29%)               | 18 (35.29%)                   |                       |                   |
| <i>Binaural</i>                               | 12 (11.77%)      | 6 (11.77%)                | 6 (11.77%)                    |                       |                   |
| Duration (n, %)                               |                  |                           |                               | 0.82                  | 0.66              |
| <i>Acute (&lt;1 month)</i>                    | 68 (66.66%)      | 32 (62.75%)               | 36 (70.59%)                   |                       |                   |
| <i>Subacute (1-3 months)</i>                  | 17 (16.67%)      | 10 (19.61%)               | 7 (13.73%)                    |                       |                   |
| <i>Chronic (&gt;3 months)</i>                 | 17 (16.67%)      | 9 (17.64%)                | 8 (15.68%)                    |                       |                   |
| Tinnitus pitch (n, %)                         |                  |                           |                               | 4.29                  | 0.12              |
| <i>Low (250-1000) Hz</i>                      | 17 (16.67%)      | 6 (11.76%)                | 11 (21.57%)                   |                       |                   |
| <i>Mid (1000-4000) Hz</i>                     | 24 (23.53%)      | 16 (31.37%)               | 8 (15.69%)                    |                       |                   |
| <i>High (4000-8000) Hz</i>                    | 61 (59.80%)      | 29 (56.87%)               | 32 (62.74%)                   |                       |                   |
| Tinnitus loudness (dB)                        | 61.23 ± 23.42    | 61.10 ± 24.71             | 61.35 ± 22.30                 | -0.06                 | 0.96              |
| <b>Outcome measurement</b>                    |                  |                           |                               |                       |                   |
| Pre-treatment THI                             | 45.80 ± 21.76    | 54.04 ± 18.45             | 37.57 ± 21.86                 | 4.11                  | <b>&lt;0.001*</b> |
| Post- treatment THI                           | 35.76 ± 19.94    | 34.94 ± 17.39             | 36.59 ± 22.35                 | -0.42                 | 0.679             |
| THI change                                    | 10.04 ± 11.64    | 19.10 ± 9.69              | 0.98 ± 3.54                   | 12.54                 | <b>&lt;0.001*</b> |

Notes:

\*: Statistical significance;

THI: Tinnitus Handicap Inventory;

HFGS: High-frequency gently sloping;

HFSS: High-frequency steeply sloping.

Table 2. Association of socio-demographic factors and audiogram configurations with effective therapy: multivariate logistic regression analysis

| Variables                | <i>B</i>  | <i>SE</i> | <i>Wald</i> | <i>P</i> value    | <i>OR</i> | 95% <i>CI</i> |       |
|--------------------------|-----------|-----------|-------------|-------------------|-----------|---------------|-------|
|                          |           |           |             |                   |           | Lower         | Upper |
| Age (year)               | -0.04     | 0.17      | 7.34        | <b>0.007*</b>     | 0.96      | 0.93          | 0.99  |
| Audiogram configurations |           | 9.18      |             | <b>0.027*</b>     |           |               |       |
| Flat                     | 1.70      | 0.61      | 7.85        | <b>0.005*</b>     | 5.45      | 1.67          | 17.86 |
| HFSS                     | 0.81      | 0.71      | 1.31        | 0.252             | 2.24      | 0.56          | 8.93  |
| HFSS                     | reference |           |             |                   | 1.00      |               |       |
| Others                   | 0.05      | 1.03      | <0.01       | 0.960             | 1.05      | 0.14          | 7.89  |
| Prior treatment THI      | 0.04      | 0.01      | 12.58       | <b>&lt;0.001*</b> | 1.04      | 1.02          | 1.07  |

Notes: \* $p < 0.05$ ; OR:Odds Ratio; 95%CI: 95% Confidence Interval.

1  
2  
3  
4  
5  
6  
7  
8  
9  
10  
11  
12  
13  
14  
15  
16  
17  
18  
19  
20  
21  
22  
23  
24  
25  
26  
27  
28  
29  
30  
31  
32  
33  
34  
35  
36  
37  
38  
39  
40  
41  
42  
43  
44  
45  
46  
47  
48  
49  
50  
51  
52  
53  
54  
55  
56  
57  
58  
59  
60

Figure 1

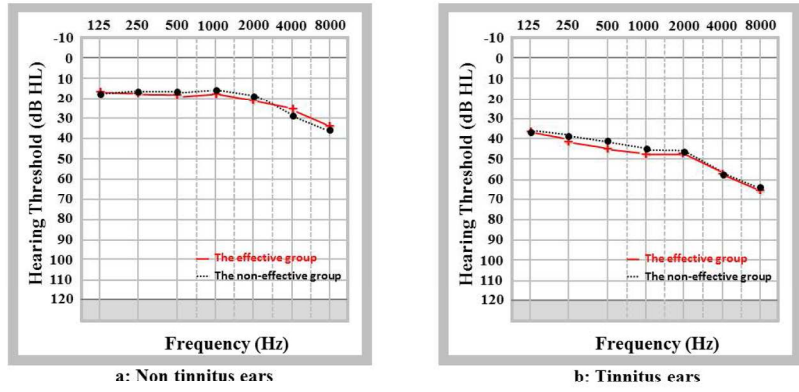

Figure 1. (Color online) The averaged pure tone hearing thresholds on tinnitus ears and non-tinnitus ears in both effective and non-effective groups.

190x107mm (300 x 300 DPI)

STROBE Statement—Checklist of items that should be included in reports of *cross-sectional studies*

|                              | Page No                | Recommendation                                                                                                                                                                                                                                                                                                                             |
|------------------------------|------------------------|--------------------------------------------------------------------------------------------------------------------------------------------------------------------------------------------------------------------------------------------------------------------------------------------------------------------------------------------|
| <b>Title and abstract</b>    | 1                      | (a) Indicate the study's design with a commonly used term in the title or the abstract<br>(b) Provide in the abstract an informative and balanced summary of what was done and what was found                                                                                                                                              |
| <b>Introduction</b>          |                        |                                                                                                                                                                                                                                                                                                                                            |
| Background/rationale         | 4-5                    | Explain the scientific background and rationale for the investigation being reported                                                                                                                                                                                                                                                       |
| Objectives                   | 6                      | State specific objectives, including any prespecified hypotheses                                                                                                                                                                                                                                                                           |
| <b>Methods</b>               |                        |                                                                                                                                                                                                                                                                                                                                            |
| Study design                 | 6,8                    | Present key elements of study design early in the paper                                                                                                                                                                                                                                                                                    |
| Setting                      | 6                      | Describe the setting, locations, and relevant dates, including periods of recruitment, exposure, follow-up, and data collection                                                                                                                                                                                                            |
| Participants                 | 6                      | (a) Give the eligibility criteria, and the sources and methods of selection of participants                                                                                                                                                                                                                                                |
| Variables                    | 7-8                    | Clearly define all outcomes, exposures, predictors, potential confounders, and effect modifiers. Give diagnostic criteria, if applicable                                                                                                                                                                                                   |
| Data sources/<br>measurement | 7-8*                   | For each variable of interest, give sources of data and details of methods of assessment (measurement). Describe comparability of assessment methods if there is more than one group                                                                                                                                                       |
| Bias                         | 6,8,14                 | Describe any efforts to address potential sources of bias                                                                                                                                                                                                                                                                                  |
| Study size                   | 6                      | Explain how the study size was arrived at                                                                                                                                                                                                                                                                                                  |
| Quantitative variables       | 9                      | Explain how quantitative variables were handled in the analyses. If applicable, describe which groupings were chosen and why                                                                                                                                                                                                               |
| Statistical methods          | 9                      | (a) Describe all statistical methods, including those used to control for confounding<br>(b) Describe any methods used to examine subgroups and interactions<br>(c) Explain how missing data were addressed<br>(d) If applicable, describe analytical methods taking account of sampling strategy<br>(e) Describe any sensitivity analyses |
| <b>Results</b>               |                        |                                                                                                                                                                                                                                                                                                                                            |
| Participants                 | 9*                     | (a) Report numbers of individuals at each stage of study—eg numbers potentially eligible, examined for eligibility, confirmed eligible, included in the study, completing follow-up, and analysed<br>(b) Give reasons for non-participation at each stage<br>(c) Consider use of a flow diagram                                            |
| Descriptive data             | 9-11,<br>table1*       | (a) Give characteristics of study participants (eg demographic, clinical, social) and information on exposures and potential confounders<br>(b) Indicate number of participants with missing data for each variable of interest                                                                                                            |
| Outcome data                 | 9-11,<br>table1,2<br>* | Report numbers of outcome events or summary measures                                                                                                                                                                                                                                                                                       |
| Main results                 | 9-11,<br>table1,2      | (a) Give unadjusted estimates and, if applicable, confounder-adjusted estimates and their precision (eg, 95% confidence interval). Make clear which confounders were adjusted for and why they were included                                                                                                                               |

|                          |                 |                                                                                                                                                                            |
|--------------------------|-----------------|----------------------------------------------------------------------------------------------------------------------------------------------------------------------------|
|                          |                 | (b) Report category boundaries when continuous variables were categorized                                                                                                  |
|                          |                 | (c) If relevant, consider translating estimates of relative risk into absolute risk for a meaningful time period                                                           |
| Other analyses           | 9-11, table 1,2 | Report other analyses done—eg analyses of subgroups and interactions, and sensitivity analyses                                                                             |
| <b>Discussion</b>        |                 |                                                                                                                                                                            |
| Key results              | 11-12           | Summarise key results with reference to study objectives                                                                                                                   |
| Limitations              | 14              | Discuss limitations of the study, taking into account sources of potential bias or imprecision. Discuss both direction and magnitude of any potential bias                 |
| Interpretation           | 11-13           | Give a cautious overall interpretation of results considering objectives, limitations, multiplicity of analyses, results from similar studies, and other relevant evidence |
| Generalisability         | 11-13           | Discuss the generalisability (external validity) of the study results                                                                                                      |
| <b>Other information</b> |                 |                                                                                                                                                                            |
| Funding                  | 15              | Give the source of funding and the role of the funders for the present study and, if applicable, for the original study on which the present article is based              |

\*Give information separately for exposed and unexposed groups.

**Note:** An Explanation and Elaboration article discusses each checklist item and gives methodological background and published examples of transparent reporting. The STROBE checklist is best used in conjunction with this article (freely available on the Web sites of PLoS Medicine at <http://www.plosmedicine.org/>, Annals of Internal Medicine at <http://www.annals.org/>, and Epidemiology at <http://www.epidem.com/>). Information on the STROBE Initiative is available at [www.strobe-statement.org](http://www.strobe-statement.org).

# BMJ Open

## Logistic Regression Analysis of Factors Influencing the Effectiveness of Intensive Sound Masking Therapy in Patients with Tinnitus

|                                 |                                                                                                                                                                                                                                                                                                                                                                                                                                                                                                                                                                                                                                                                                                                                                                                                                                                                                                                                                                                                     |
|---------------------------------|-----------------------------------------------------------------------------------------------------------------------------------------------------------------------------------------------------------------------------------------------------------------------------------------------------------------------------------------------------------------------------------------------------------------------------------------------------------------------------------------------------------------------------------------------------------------------------------------------------------------------------------------------------------------------------------------------------------------------------------------------------------------------------------------------------------------------------------------------------------------------------------------------------------------------------------------------------------------------------------------------------|
| Journal:                        | <i>BMJ Open</i>                                                                                                                                                                                                                                                                                                                                                                                                                                                                                                                                                                                                                                                                                                                                                                                                                                                                                                                                                                                     |
| Manuscript ID                   | bmjopen-2017-018050.R2                                                                                                                                                                                                                                                                                                                                                                                                                                                                                                                                                                                                                                                                                                                                                                                                                                                                                                                                                                              |
| Article Type:                   | Research                                                                                                                                                                                                                                                                                                                                                                                                                                                                                                                                                                                                                                                                                                                                                                                                                                                                                                                                                                                            |
| Date Submitted by the Author:   | 27-Sep-2017                                                                                                                                                                                                                                                                                                                                                                                                                                                                                                                                                                                                                                                                                                                                                                                                                                                                                                                                                                                         |
| Complete List of Authors:       | Cai, Yuexin; Sun Yat-Sen Memorial Hospital, Department of Otolaryngology<br>Zhou, Qian; Institute of Hearing and Speech-Language Science, Sun Yat-sen University<br>Yang, Haidi; Sun Yat-Sen Memorial Hospital, Department of Otolaryngology<br>Jiang, Jiajia; Sun Yat-Sen Memorial Hospital, Department of Otolaryngology<br>Zhao, Fei; Cardiff Metropolitan University, 2. Department of Speech Language Therapy and Hearing Science<br>Huang, Xiayin; Sun Yat-Sen Memorial Hospital, Department of Otolaryngology<br>Mo, Hanjie; Sun Yat-Sen Memorial Hospital, Department of Otolaryngology<br>Chen, Xiaoting; Sun Yat-Sen Memorial Hospital, Department of Otolaryngology<br>Xiong, Hao; Sun Yat-Sen Memorial Hospital, Department of Otolaryngology<br>Chen, Suijun; Sun Yat-Sen Memorial Hospital, Department of Otolaryngology<br>Zhang, Xueyuan; Sun Yat-Sen Memorial Hospital, Department of Otolaryngology<br>zheng, yiqing; Sun Yat-Sen Memorial Hospital, Department of Otolaryngology |
| <b>Primary Subject Heading</b>: | Ear, nose and throat/otolaryngology                                                                                                                                                                                                                                                                                                                                                                                                                                                                                                                                                                                                                                                                                                                                                                                                                                                                                                                                                                 |
| Secondary Subject Heading:      | Ear, nose and throat/otolaryngology                                                                                                                                                                                                                                                                                                                                                                                                                                                                                                                                                                                                                                                                                                                                                                                                                                                                                                                                                                 |
| Keywords:                       | Sound Masking, Tinnitus, Audiometric Configuration, Prognostic Factors                                                                                                                                                                                                                                                                                                                                                                                                                                                                                                                                                                                                                                                                                                                                                                                                                                                                                                                              |
|                                 |                                                                                                                                                                                                                                                                                                                                                                                                                                                                                                                                                                                                                                                                                                                                                                                                                                                                                                                                                                                                     |

SCHOLARONE™  
Manuscripts

1  
2  
3  
4  
5  
6  
7  
8  
9  
10  
11  
12  
13  
14  
15  
16  
17  
18  
19  
20  
21  
22  
23  
24  
25  
26  
27  
28  
29  
30  
31  
32  
33  
34  
35  
36  
37  
38  
39  
40  
41  
42  
43  
44  
45  
46  
47  
48  
49  
50  
51  
52  
53  
54  
55  
56  
57  
58  
59  
60

**Logistic Regression Analysis of Factors Influencing the Effectiveness of  
Intensive Sound Masking Therapy in Patients with Tinnitus**

Yuexin Cai<sup>1,2,\*</sup>, Qian Zhou<sup>3,\*</sup>, Haidi Yang<sup>1,2</sup>, Jiajia Jiang<sup>1,2</sup>, Fei Zhao<sup>4,5</sup>, Xiayin Huang<sup>1,2</sup>, Hanjie Mo<sup>1,2</sup>, Xiaoting Chen<sup>1,2</sup>, Hao Xiong<sup>1,2</sup>, Suijun Chen<sup>1,2</sup>, Xueyuan Zhang<sup>1,2</sup>, Yiqing Zheng<sup>1,2,a</sup>

<sup>1</sup>Department of Otolaryngology, Sun Yat-sen Memorial Hospital, Sun Yat-sen University, Guangzhou City, Guangdong Province, China

<sup>2</sup>Institute of Hearing and Speech-Language Science, Sun Yat-sen University, Guangzhou City, Guangdong Province, China

<sup>3</sup>Clinical research center, The First Affiliated Hospital, Sun Yat-sen University.

<sup>4</sup>Department of Speech Language Therapy and Hearing Science, Cardiff Metropolitan University, Cardiff, Wales, UK.

<sup>5</sup>Department of Hearing and Speech Science, Xinhua College, Sun Yat-Sen University, Guangzhou, China.

\*Yuexin Cai and Qian Zhou contributed equally to this work.

<sup>a</sup>Author to whom correspondence should be addressed;

Electronic mail: yiqingzheng@hotmail.com

Phone number: +86 (0) 02081332115

Fax number: +86 (0) 02081332115

**Abstract**

**Objectives:** To investigate factors influencing the effectiveness intensive sound masking therapy on tinnitus using Logistic Regression Analysis.

**Design:** The study used a retrospective cross-section analysis.

**Participants:** 102 patients with tinnitus were recruited at the Sun Yat-sen Memorial Hospital of Sun Yat-sen University, China.

**Intervention:** Intensive sound masking therapy was used as an intervention approach for patients with tinnitus.

**Primary and secondary outcome measures:** participants underwent audiological investigations and tinnitus pitch and loudness matching measurements, followed by intensive sound masking therapy. The Tinnitus Handicap Inventory (THI) was used as



1  
2  
3 the outcome measure pre- and post-treatment. Multivariate logistic regression was  
4 performed to investigate the association of demographic and audiological factors with  
5 effective therapy.  
6  
7

8  
9 **Results:** According to the THI score changes *pre*-and *post*-sound masking  
10 intervention, fifty-one participants were categorised into an effective group, the  
11 remaining 51 participants were placed in a non-effective group. Those in the effective  
12 group were significantly younger than those in the non-effective group ( $p=0.012$ ).  
13 Significantly more participants had flat audiogram configurations in the effective  
14 group ( $p=0.04$ ). Multivariable logistic regression analysis showed that age (OR=0.96,  
15 95% CI: 0.93, 0.99,  $p=0.007$ ), audiometric configuration ( $p=0.027$ ) and THI score  
16 pre-treatment (OR=1.04, 95% CI: 1.02, 1.07,  $p<0.001$ ) were significantly associated  
17 with therapeutic effectiveness. Further analysis showed that patients with flat  
18 audiometric configurations were 5.45 times more likely to respond to intervention  
19 than those with high-frequency steeply sloping audiograms (OR=5.45, 95% CI: 1.67,  
20 17.86,  $p=0.005$ ).  
21  
22  
23  
24  
25  
26  
27  
28  
29  
30  
31

32 **Conclusion:** Audiometric configuration, age and THI scores appear to be predictive  
33 for the effectiveness of sound masking treatment. Gender, tinnitus characteristics and  
34 hearing threshold measures seem not to be related to treatment effectiveness. Further  
35 randomized control study is needed to provide further evidence of the effectiveness of  
36 prognostic factors in tinnitus interventions.  
37  
38  
39  
40  
41

42 **Key Words:**

43 Sound Masking; Tinnitus; Audiometric Configuration; Prognostic Factors  
44  
45  
46  
47  
48  
49  
50  
51  
52  
53  
54  
55  
56  
57  
58  
59  
60

**Strengths**

- A relatively large sample of participants were included in the present study;
- A robust analytical method (i.e., Logistic regression) was employed to explore the predictive factors associated with significant effective outcomes of sound masking treatment.

**Limitation**

- Due to patient adherence in the context of Chinese culture and Healthcare system, only intensive sound masking intervention was provided, and the short-term effectiveness was subsequently assessed in present study.

## INTRODUCTION :

Tinnitus is the perception of noise in the absence of any external sound. It is considered as one of the most common and disturbing health problems<sup>1</sup>. It is widely accepted that tinnitus is a symptom caused by diverse pathologies as a result of not only peripheral hearing loss, but also aberrant neural activity in the central auditory nervous system<sup>2-4</sup>. Various theories have been proposed to elaborate underlying possible mechanisms, such as; Discordant theory - the discordant dysfunction of damaged outer hair cells and intact inner hair cells<sup>5</sup>, and Auditory plasticity theory - damaged cochlea activates auditory plasticity by enhancing neural activity in the central auditory pathway, which results in abnormal input to the central auditory system<sup>4</sup>.

Epidemiological studies indicate that one third of all adults experience tinnitus at some time in their lives and 10 to 15% have prolonged tinnitus requiring medical intervention<sup>6</sup>. A number of interventions are available for tinnitus management within ENT/Audiology clinics, including: pharmacotherapy, cognitive behavioural therapy (CBT), habituation therapy (Tinnitus retraining therapy, TRT), electrical suppression (e.g., repetitive transcranial magnetic stimulation r-TMS) and sound therapy (e.g., sound masking). Of these, tinnitus sound masking therapy has been widely used in patients reporting any tinnitus characteristics<sup>7</sup>. According to the Cochrane review by Hobson et al.<sup>8,9</sup>, no significant difference was shown in the loudness of tinnitus or the overall severity of tinnitus following the use of sound masking therapy when compared to other interventions.

Furthermore, evidence has shown that no single treatment for tinnitus is found effective in all patients<sup>8,9</sup>. These discrepancies in effectiveness are largely due to the complex mechanisms behind the symptoms as indicated above and the severity of impact on sufferers. Previous studies suggest that there are many influencing factors such as; age, tinnitus characteristics, hearing status and demographic factors, which affect the effectiveness of tinnitus management<sup>1,10</sup>. However, the results appear inconsistent. For example, Koizumi et al.<sup>11</sup> found better outcomes with TRT for

1  
2  
3 patients with higher levels of tinnitus loudness, while Ariizumi et al.<sup>12</sup> reported lower  
4 tinnitus loudness to be predictive of better outcomes with TRT.  
5

6  
7 In addition, Kleinjung et al.<sup>6</sup> suggest that mild hearing loss and shorter tinnitus  
8 duration are more likely to be beneficial when using rTMS. These results are in  
9 keeping with the influencing factors seen when using sound masking therapy<sup>1</sup>. It is  
10 also noteworthy that younger age and severe depression contributed to a positive  
11 response with CBT<sup>13</sup>. Conrad et al.<sup>14</sup> further clarify that dysfunctional cognition is  
12 associated with CBT outcome, i.e., more severe dysfunctional cognition results in a  
13 more negative emotional outcome after CBT intervention.  
14  
15

16  
17 To our best knowledge, there are few studies available on the factors that  
18 influence the effectiveness of sound masking therapy. A recent study by Theodoroff  
19 et al.<sup>1</sup> appears to be the only report directly investigating the factors associated with  
20 effective tinnitus treatment using sound masking therapy<sup>1</sup>. Although they found  
21 several positive predictors, such as younger age, better self-reported hearing  
22 difficulty, shorter durations of tinnitus and better hearing threshold at low frequency  
23 region, these results were obtained by combining tinnitus treatment data from sound  
24 masking therapy or TRT. The separate analysis showed that younger participants  
25 had significant improvement only in the TRT group ( $p < 0.017$ ) and that age was not a  
26 significant factor in the group using sound masking therapy ( $p = 0.143$ ). Such bias  
27 indicated that further investigation is needed to clarify possible factors associated with  
28 effective sound masking therapy.  
29  
30

31  
32 Evidence has shown that audiometric configuration is associated with ear  
33 pathologies. For example, noise induced hearing loss is related to the audiogram with  
34 a 3-6 kHz dip<sup>15</sup>. Understanding audiometric configurations may provide insights into  
35 the etiologic mechanism and prevalence of tinnitus<sup>16-19</sup>. In the study by Demeester et  
36 al.<sup>19</sup>, tinnitus was found to be significantly more prevalent in individuals with a  
37 high-frequency steeply sloping audiogram than those with a flat audiogram. However,  
38 it is still unclear as to how audiometric configuration affects sound masking  
39 intervention in tinnitus.  
40  
41

42  
43 The purpose of this study was to use Logistic Regression Analysis to identify  
44  
45  
46  
47  
48  
49  
50  
51  
52  
53  
54  
55  
56  
57  
58  
59  
60

any factors that might influence on tinnitus sound masking, and which might predict the effectiveness of sound masking interventions in tinnitus sufferers. Significant result would offer valuable to practice in predicting the effectiveness of sound masking intervention and thus influence therapeutic strategy selection.

## MATERIALS AND METHODS

### *Participants*

The present research was a retrospective study of 102 patients with tinnitus who underwent audiological investigations and specific tinnitus examinations, followed by seven days sound masking intervention at the Sun Yat-sen Memorial Hospital of Sun Yat-sen University, China. Detailed selection criteria for inclusion in this study are:-

- (1) They had sought clinical help for their tinnitus problem, which had lasted more than 2 weeks;
- (2) They had no history of head trauma or central nervous system disorders;
- (3) They had mild to severe sensorineural hearing loss. All tinnitus patients with either current conductive hearing loss or previous middle ear surgery (e.g., mastoidectomy) were excluded<sup>17</sup>.
- (4) The tinnitus patients with pulsatile tinnitus due to aberrant vascular malformation were also excluded.

Mean age was 44.98 years (SD: 15.41). There were 46 males and 56 females (Table 1). This study was approved by the ethics committee of Sun Yat-sen Memorial Hospital, Sun Yat-sen University.

### *Routine Audiological Examinations*

Routine audiological examination consisted of otoscopy, followed by pure-tone audiometry in which air conduction thresholds were measured for both ears at 125 Hz, 250 Hz, 500 Hz, 1.0 kHz, 2.0 kHz, 4.0 kHz and 8.0 kHz, and bone conduction hearing thresholds were measured between 250 Hz and 4.0 kHz in a sound-proof booth. The

1  
2  
3 mean hearing threshold is the average of hearing sensitivity at the frequencies of 500,  
4 1000, 2000 and 4000 Hz.  
5  
6

7  
8 On the basis of the audiograms, the audiometric configurations were classified as  
9 either flat, high-frequency gently sloping (HFGS), high-frequency steeply sloping  
10 (HFSS), low-frequency ascending (LFA), mid-frequency U-curve (MFU) and  
11 mid-frequency reversed U-curve (MFRU) in accordance with the criteria used in the  
12 study by Hannula et al.<sup>15</sup>.  
13  
14  
15  
16

### 17 *Tinnitus Specific Assessments*

18  
19  
20 Patients were asked to describe their tinnitus characteristics, including duration  
21 and laterality (i.e., being in the right, left or both ears or central in the head). Tinnitus  
22 pitch and loudness matching measurements were performed ipsilaterally to the ear  
23 with predominant or louder tinnitus if there was a difference between the two sides.  
24 However, if the tinnitus ear had severe hearing loss, the contralateral ear was tested  
25 instead<sup>20</sup>. When the tinnitus was equally loud on both sides or was localized in the  
26 head, the matching tones were given to the ear with the better hearing. Otherwise, the  
27 ear was chosen randomly if there was no difference between the acuity of the two  
28 ears.  
29  
30  
31  
32  
33  
34  
35  
36

37  
38 During the tinnitus pitch matching tests, the 9 audiometric frequencies between  
39 125 Hz and 8.0 kHz (i.e., 125 Hz, 250 Hz, 500 Hz, 1.0 kHz, 2.0 kHz, 3.0 kHz, 4.0  
40 kHz, 6.0 kHz, and 8.0kHz) were firstly used to roughly match the tinnitus pitch.  
41 Participants were initially asked to make a clear distinction between the tinnitus pitch  
42 perception and presented matching tones, and then they reported verbally whether the  
43 matching tone needed to go higher or lower until the exact matching tone or a close  
44 approximation to their tinnitus was obtained. The test tone was adjusted in a  
45 half-octave step. If there was no matching with a pure tone perceived by participants,  
46 narrow-band noise was used instead.  
47  
48  
49  
50  
51  
52  
53  
54  
55  
56  
57  
58  
59  
60

1  
2  
3 When the matching frequency was found, the level was initially set to 5 dB above  
4 the measured audiometric threshold to find an approximate tinnitus loudness level,  
5 then the level was adjusted in 1 dB step until the subject indicated that the tone  
6 matched the loudness of their tinnitus<sup>20</sup>.  
7  
8  
9  
10

### 11 ***The Sound Masking Intervention***

12  
13  
14 Due to patient adherence in the context of Chinese culture and Healthcare system,  
15 a high drop-out rate occurred when patients received a longer duration of sound  
16 masking intervention. Considering the nature (i.e., a retrospective study) and main  
17 purpose of the present study, current data was obtained only from intensive sound  
18 masking intervention, and the short-term effectiveness was assessed. The  
19 narrow-band noise at 10 dB above the tinnitus frequency was delivered to mask the  
20 tinnitus through headphones (Beyerdynamic DT880 pro) 4-6 times daily for 20-30  
21 minutes, for a week<sup>21, 22</sup>.  
22  
23  
24  
25  
26  
27  
28  
29

### 30 ***Self-reported tinnitus issues and Tinnitus Handicap Inventory (THI) Questionnaire***

31  
32  
33 Information on the tinnitus characteristics was collected. Patients were asked to  
34 describe the tinnitus duration and laterality (i.e., in the right, left or both ears).  
35 According to the tinnitus sound masking therapy protocol, the effectiveness of the  
36 sound masking intervention was evaluated using the Tinnitus Handicap Inventory  
37 (THI) pre and post intervention. The THI questionnaire was provided to the patient  
38 before initial treatment, and after seven days of sound masking therapy at tinnitus  
39 review clinics. The THI is a 25-item measure for evaluating the self-perceived level of  
40 handicap caused by tinnitus, based on a 0-100 increasing handicap scale (with 100  
41 being total handicap and 0 being no handicap)<sup>23</sup>. Significant effectiveness was defined  
42 as a minimum of 7 points improvement in overall THI score after the sound masking  
43 intervention<sup>24, 25</sup>.  
44  
45  
46  
47  
48  
49  
50  
51  
52  
53

### 54 ***Statistical Analysis***

1  
2  
3  
4  
5  
6  
7  
8  
9  
10  
11  
12  
13  
14  
15  
16  
17  
18  
19  
20  
21  
22  
23  
24  
25  
26  
27  
28  
29  
30  
31  
32  
33  
34  
35  
36  
37  
38  
39  
40  
41  
42  
43  
44  
45  
46  
47  
48  
49  
50  
51  
52  
53  
54  
55  
56  
57  
58  
59  
60

Continuous data are expressed as mean±standard deviation (SD) or median (interquartile range, IQR), as appropriate, and categorical data are shown as frequencies and percentages. Student's *t*-tests (for continuous variables), Wilcoxon Rank sum tests (for skewed distribution of continuous variables), and chi-square tests (for categorical variables) were used to assess differences in socio-demographic characteristics and tinnitus relevant factors by therapeutic efficacy (effectiveness versus non-effectiveness). Multivariate logistic regression models were performed to assess the independent association of demographic and tinnitus relevant factors with effective therapy. Odds ratio (OR) and its 95% confidence interval (CI) were estimated for each factor. A *p* level of less than <0.05 (two-sided) was considered to be statistically significant. All statistical analyses were conducted using SAS software version 9.4 (SAS Institute, Inc., Cary, NC, USA).

## RESULTS

On the basis of the THI score changes *pre*-and *post*-sound masking intervention (i.e., equal or greater than 7 points), fifty-one participants were entered in the effective group, whereas the remaining 51 participants were placed in the non-effective group. Table 1 shows comparisons of related factors between effective and ineffective groups, respectively. In the present study, age and gender factors were compared between the effective group and the non-effective group using Student *t*-test and Chi-square test, respectively. The Student *t*-test showed that participants in the effective group were significantly younger than those in the non-effective group ( $t=-2.55$ ,  $p=0.012$ ). However, there was no significant difference in gender between these two groups ( $\chi^2=2.53$ ,  $df=1$ ,  $p=0.163$ ).

**Please insert Table 1 near here**

For the purpose of understanding the basic hearing status, the averaged pure tone hearing thresholds across frequencies from 125 Hz to 8000 Hz on tinnitus ears and non-tinnitus ears were analyzed in both groups. As shown in Figure 1, the hearing



1  
2  
3 threshold of each frequency from 125 Hz to 8000 Hz revealed no significant  
4 differences between the two groups ( $p>0.05$ ). Significantly worse hearing thresholds  
5 at each frequency in tinnitus ears were found in both groups ( $p<0.05$ ) when compared  
6  
7  
8  
9 to hearing thresholds in non-tinnitus ears.

10  
11 **Please insert Figure 1 near here**  
12

13  
14 Based on audiometric configuration classification criteria, patients in the  
15 effective group had; a flat audiogram (62.75%), HFGS (17.65%) and HFSS (15.69%).  
16 Patients in the non-effective group had flat audiogram (35.29%), HFGS (23.53%) and  
17 HFSS (31.37%) configurations, respectively. Only 7 cases had LFA, MFU or MFRU,  
18 which were classified as 'others' for the purpose of analysis. Further comparative  
19 analysis indicated that there were significantly more flat audiogram configurations  
20 together with lower HFGS and HFSS audiograms in the effective group than in the  
21 non-effective group ( $\chi^2=8.30$ ,  $df=3$ ;  $p=0.04$ ) (Table 1). Laterality, duration, tinnitus  
22 pitch and loudness showed no significant differences between the two groups.  
23  
24  
25  
26  
27  
28  
29

30  
31 As shown in Table 1, the THI score of pre-sound masking intervention was used  
32 as a baseline measurement. The averaged THI scores pre intervention were 54.04  
33 (SD=18.45) and 37.57 (SD=21.86) for effective and non-effective groups,  
34 respectively. Significantly lower THI scores were found *pre-* intervention in the  
35 non-effective group ( $t=4.11$ ,  $p<0.001$ ). However, there was no significant difference  
36 in the THI scores *post-*intervention between the two groups. As a result, significant  
37 differences were found in the *pre* and *post* THI score changes between the groups as a  
38 result of the intervention (19.10 vs. 0.98,  $t=12.54$ ,  $p<0.001$ ). Further analysis showed  
39 that THI scores were significantly reduced in the effective group ( $t=-14.07$ ,  $p<0.001$ ),  
40 whereas no significant reduction in the THI scores was found in the non-effective  
41 group in comparison of THI score between pre- and post- sound masking ( $t=-1.98$ ,  
42  $p=0.054$ ).  
43  
44  
45  
46  
47  
48  
49  
50  
51  
52

53 To identify predictive factors for the effectiveness of sound masking intervention,  
54 all factors that showed significance between both effective and non-effective groups  
55 were used as variables for a logistic regression analysis. Because the audiometric  
56  
57  
58  
59  
60

1  
2  
3 configuration variable was categorised as four sub-groups, estimates of pair  
4 comparisons were subsequently performed. Results of the multivariable logistic  
5 regression analysis are summarised in Table 2. Age factor was negatively associated  
6 with effective treatment (OR=0.96, 95% CI: 0.93, 0.99,  $p=0.007$ ), indicating that an  
7 increase in age of one year is associated with a 4% decrease in the effectiveness of the  
8 intervention. Audiometric configuration factor was also found to be an independent  
9 factor associated with intervention effectiveness ( $p=0.027$ ). Further analysis showed  
10 that tinnitus patients with a flat audiometric configuration were 5.45 times more likely  
11 to have a successful intervention when compared to those with HFSS configurations  
12 (OR=5.45, 95% CI: 1.67, 17.86,  $p=0.005$ ). However, no significant results were found  
13 when comparing the other audiometric configurations. In addition, THI score  
14 pre-treatment was positively associated with successful treatment (OR=1.04, 95%CI:  
15 1.02, 1.07,  $p<0.001$ ), indicating that one unit increase in THI score before treatment  
16 was associated with 4% increase in therapeutic effectiveness.  
17  
18  
19  
20  
21  
22  
23  
24  
25  
26  
27  
28  
29

30 **Please insert Table 2 near here**

### 31 **Discussion**

32  
33 The present study demonstrates that certain factors can be prognostic for the  
34 effectiveness of intensive sound masking therapy. Logistic regression analysis  
35 indicates that age, audiogram configuration and THI scores prior to treatment were  
36 significantly related to the effectiveness of sound masking therapy. Patients with a flat  
37 audiogram, being younger in age and having higher THI scores were more likely to  
38 have positive outcomes. These findings show the importance of individual factors in  
39 predicting the likelihood of therapeutic effectiveness.  
40  
41  
42  
43  
44  
45  
46  
47  
48

49 Participants with a flat audiogram were more likely to respond positively to  
50 intensive sound masking intervention than those with a HFSS audiogram but there  
51 was no relation to an average hearing threshold profile. To our best knowledge, no  
52 previous study has investigated the influence of audiometric configuration on the  
53 outcome of tinnitus intervention, even though the study by Chang et al.<sup>26</sup> showed that  
54  
55  
56  
57  
58  
59  
60

1  
2  
3 patients with a flat pattern audiogram benefited more from hearing aids compared to  
4 those with rising or decreasing audiogram in terms of improvement of psychological  
5 handicap and quality of life. The present result is likely to be due to tinnitus  
6 characteristics together with their associated hearing status. By recording Transient  
7 Otoacoustic Emissions (TEOAEs), Kim et al.<sup>17</sup> found that normal TEOAE rates were  
8 significantly higher in tinnitus patients with flat audiogram than those in the HFGS  
9 and HFSS groups. Moreover, tinnitus patients with HFSS had significantly lower  
10 response rates of TEOAEs at 3, 4 and 6 kHz than tinnitus patients with flat  
11 audiogram. Therefore, better hearing status in tinnitus patients with a flat audiogram  
12 may be underlying factor, which is consistent with the previous finding reported by  
13 Theodoroff et al.<sup>1</sup>. However, this result should be interpreted with cautious due to the  
14 retrospective nature of this study. To resolve further prospective research is needed  
15 using systematic approaches, such as randomized controlled trials<sup>27</sup>.

16  
17  
18  
19  
20  
21  
22  
23  
24  
25  
26  
27  
28  
29  
30  
31  
32  
33  
34  
35  
36  
37  
38  
39  
40  
41  
42  
43  
44  
45  
46  
47  
48  
49  
50  
51  
52  
53  
54  
55  
56  
57  
58  
59  
60  
Higher THI scores before treatment were correlated with a better response to  
sound masking. These results are consistent with the findings of Koizumi et al.<sup>11</sup> and  
Theodoroff et al.<sup>1</sup>, who found tinnitus retraining therapy (TRT) more effective in  
patients with higher THI scores. Koizumi et al.<sup>11</sup> further suggested that TRT should  
be introduced to tinnitus patients with THI score higher than 50 points. Because  
overall THI score may reflect the distress in tinnitus patients, these results suggested  
that sound masking may be regarded as a useful therapy to alleviate the distress cause  
by tinnitus, particularly in patients in severe distress<sup>28</sup>.

There are several possible mechanisms behind sound masking therapy, but the  
exact mechanism is still unclear. Overall, it is generally accepted that there is a  
reduction in response to a signal due to the presence of another. The  
neuro-physiological mechanism can be explained through an understanding that the  
neural activity caused by the first sound signal (tinnitus) is reduced by the neural  
activity of the other sound (e.g., masking noise). For example, recent  
magnetoencephalography (MEG) data reported by Adjamian et al.,<sup>29</sup> support the  
efficacy of sound masking on psychological handicap (depression and anxiety),

1  
2  
3 reflecting a reduction in delta band activity, which is considered a possible neuronal  
4 marker for the effect of masking<sup>7</sup>.  
5  
6

7  
8 Various advanced neuroimaging techniques such as fMRI and PET provide a  
9 valuable tool to explore the mechanism of tinnitus. For example, Lanting et al.<sup>30</sup> used  
10 fMRI and PET to identify enhanced neural activity across several areas of the central  
11 auditory system. They also found that neural activity in non-auditory areas (i.e.,  
12 frontal areas, limbic system and cerebellum) seemed to associate with the perception  
13 of tinnitus. Further studies comparing the subjective perception of tinnitus and central  
14 neural activity changes between *pre-* and *post-*sound masking therapy are needed in  
15 order to clarify the neural marker as well as the mechanisms of the effective sound  
16 masking therapy.  
17  
18

19  
20 In the present study, younger age had a positive effect on the benefits of sound  
21 masking therapy. Von Wedel et al.<sup>31</sup> suggested that younger tinnitus patients are more  
22 likely to report distress and tinnitus annoyance than older patients. Moreover, Seydel  
23 et al.<sup>32</sup> demonstrated that younger tinnitus subjects suffered distress more severely  
24 than older tinnitus subjects, due to higher levels of occupational and personal stress  
25 among younger subjects<sup>32</sup>. As a result, younger subjects are likely to gain more  
26 benefit in alleviating their high level distress by sound masking intervention<sup>7</sup>. Another  
27 explanation could be the better coping capability of younger tinnitus sufferers than older  
28 subjects<sup>32</sup>.  
29  
30  
31  
32  
33  
34  
35  
36  
37  
38  
39  
40  
41  
42

43 There are some limitations in the present study that need to be considered.  
44 Influencing factors associated with long-term effectiveness of sound masking therapy  
45 could not be investigated due to the patient adherence issue. Moreover, because of the  
46 retrospective design of the study, only THI is used to measure the effectiveness of  
47 sound masking therapy. Additional tinnitus measurements could be taken it into  
48 account, such as Visual Analogue Scale (VAS), and Tinnitus Functional Index (TFI)  
49 <sup>33</sup>. Therefore, future prospective longitudinal research is needed to explore the  
50  
51  
52  
53  
54  
55  
56  
57  
58  
59  
60

1  
2  
3 long-term effectiveness of sound masking therapy, together with its associated  
4 influencing factors.  
5  
6  
7  
8  
9

## 10 **Conclusion**

11  
12 This retrospective study suggests that audiometric configuration, age, and THI  
13 scores pre-treatment are predictive of beneficial sound masking outcomes. Further  
14 analysis indicates that tinnitus patients with a flat audiogram configuration are more  
15 likely to achieve a successful intervention when compared to those with  
16 high-frequency steeply sloping audiograms. Gender, tinnitus laterality, duration and  
17 hearing threshold are not related to the effectiveness of intensive sound masking  
18 treatment. However, these results should be interpreted with caution due to the  
19 retrospective nature of this study. A future randomized control study is needed to  
20 provide further evidence for prognostic factors (e.g. audiometric configuration, age,  
21 THI score) and their contribute to the effectiveness of tinnitus interventions.  
22  
23  
24  
25  
26  
27  
28  
29  
30  
31  
32  
33  
34

## 35 **Acknowledgments**

36 We would like to acknowledge Dr. Christopher Wigham for his proof reading.

37  
38 **Contributors** YXC and YQZ Contributed to the study design. HDY, JJJ, XYH and  
39 XYZ collected the data. QZ and HDY designed the plan of analysis. QZ, HX and SJC  
40 performed the final analyses. YXC, FZ, HJM and XTC drafted the manuscript and  
41 interpreted the results. All authors made substantive editorial contributions at all  
42 stages of manuscript preparation.  
43  
44  
45  
46  
47

## 48 **Funding**

49  
50 This work was funded by National Natural Science Foundation of China (Grant No.  
51 81600808 and 81570935), Natural Science Foundation of Guangdong Province (Grant  
52 No. 2016A030313318 and 2015A030310134) and National University Student  
53 Innovation Training Scheme (Grant No. 201601133).  
54  
55  
56

## 57 **Competing interests**

1  
2  
3  
4  
5  
6  
7  
8  
9  
10  
11  
12  
13  
14  
15  
16  
17  
18  
19  
20  
21  
22  
23  
24  
25  
26  
27  
28  
29  
30  
31  
32  
33  
34  
35  
36  
37  
38  
39  
40  
41  
42  
43  
44  
45  
46  
47  
48  
49  
50  
51  
52  
53  
54  
55  
56  
57  
58  
59  
60

None declared.

**Data sharing statements**

No additional data are available. However, the original data that support the findings derived from this study can be requested by emailing [yiqingzheng@hotmail.com](mailto:yiqingzheng@hotmail.com)

For peer review only

## REFERENCES

- 1 Theodoroff SM, Schuette A, Griest S, *et al.*. Individual patient factors associated with effective tinnitus treatment. *J AM ACAD AUDIOL* 2014;25:631-43.
- 2 Han BI, Lee HW, Kim TY, *et al.*. Tinnitus: characteristics, causes, mechanisms, and treatments. *J CLIN NEUROL* 2009;5:11-9.
- 3 Chen YC, Wang F, Wang J, *et al.*. Resting-State Brain Abnormalities in Chronic Subjective Tinnitus: A Meta-Analysis. *FRONT HUM NEUROSCI* 2017;11:22.
- 4 Chen YC, Zhang J, Li XW, *et al.*. Aberrant spontaneous brain activity in chronic tinnitus patients revealed by resting-state functional MRI. *Neuroimage Clin* 2014;6:222-8.
- 5 Baguley D. Mechanism of tinnitus. *BRIT MED BULL* 2002;1:195-212.
- 6 Kleinjung T, Steffens T, Sand P, *et al.*. Which tinnitus patients benefit from transcranial magnetic stimulation? *Otolaryngol Head Neck Surg* 2007;137:589-95.
- 7 Hoare DJ, Searchfield GD, El RA, *et al.*. Sound therapy for tinnitus management: practicable options. *J AM ACAD AUDIOL* 2014;25:62-75.
- 8 Hobson J, Chisholm E, El RA. Sound therapy (masking) in the management of tinnitus in adults. *Cochrane Database Syst Rev* 2012;11:D6371.
- 9 Hobson J, Chisholm E, El RA. Sound therapy (masking) in the management of tinnitus in adults. *Cochrane Database Syst Rev* 2010:D6371.
- 10 Herraiz C, Hernandez FJ, Toledano A, *et al.*. Tinnitus retraining therapy: prognosis factors. *Am J Otolaryngol* 2007;28:225-9.
- 11 Koizumi T, Nishimura T, Sakaguchi T, *et al.*. Estimation of factors influencing the results of tinnitus retraining therapy. *Acta Otolaryngol Suppl* 2009:40-5.
- 12 Ariizumi Y, Hatanaka A, Kitamura K. Clinical prognostic factors for tinnitus retraining therapy with a sound generator in tinnitus patients. *J Med Dent Sci* 2010;57:45-53.
- 13 Graul J, Klinger R, Greimel KV, *et al.*. Differential outcome of a multimodal cognitive-behavioral inpatient treatment for patients with chronic decompensated tinnitus. *Int Tinnitus J* 2008;14:73-81.
- 14 Conrad I, Kleinstaubler M, Jasper K, *et al.*. The changeability and predictive value of dysfunctional cognitions in cognitive behavior therapy for chronic tinnitus. *Int J Behav Med* 2015;22:239-50.
- 15 Hannula S, Bloigu R, Majamaa K, *et al.*. Audiogram configurations among older adults: prevalence and relation to self-reported hearing problems. *INT J AUDIOL* 2011;50:793-801.
- 16 Kim SY, Jeon YJ, Lee JY, *et al.*. Characteristics of tinnitus in adolescents and association with psychoemotional factors. *LARYNGOSCOPE* 2016.
- 17 Kim SI, Kim MG, Kim SS, *et al.*. Evaluation of tinnitus patients by audiometric configuration. *Am J Otolaryngol* 2016;37:1-5.
- 18 Schecklmann M, Vielsmeier V, Steffens T, *et al.*. Relationship between Audiometric slope and tinnitus pitch in tinnitus patients: insights into the mechanisms of tinnitus generation. *PLOS ONE* 2012;7:e34878.
- 19 Demeester K, van Wieringen A, Hendrickx JJ, *et al.*. Prevalence of tinnitus and audiometric shape. *B-ENT* 2007;3 Suppl 7:37-49.



- 1
  - 2
  - 3
  - 4
  - 5
  - 6
  - 7
  - 8
  - 9
  - 10
  - 11
  - 12
  - 13
  - 14
  - 15
  - 16
  - 17
  - 18
  - 19
  - 20
  - 21
  - 22
  - 23
  - 24
  - 25
  - 26
  - 27
  - 28
  - 29
  - 30
  - 31
  - 32
  - 33
  - 34
  - 35
  - 36
  - 37
  - 38
  - 39
  - 40
  - 41
  - 42
  - 43
  - 44
  - 45
  - 46
  - 47
  - 48
  - 49
  - 50
  - 51
  - 52
  - 53
  - 54
  - 55
  - 56
  - 57
  - 58
  - 59
  - 60
- 20 Kim TS, Yoo MH, Lee HS, *et al.*. Short-term changes in tinnitus pitch related to audiometric shape in sudden sensorineural hearing loss. *AURIS NASUS LARYNX* 2016;43:281-6.
- 21 Teismann H, Okamoto H, Pantev C. Short and intense tailor-made notched music training against tinnitus: the tinnitus frequency matters. *PLOS ONE* 2011;6:e24685.
- 22 Xu Y, Zhou H, Yang D. [Clinical observation of the relationship between tinnitus masking curve and masking therapy result]. *Lin Chung Er Bi Yan Hou Tou Jing Wai Ke Za Zhi* 2009;23:588-90.
- 23 Newman CW, Jacobson GP, Spitzer JB. Development of the Tinnitus Handicap Inventory. *Arch Otolaryngol Head Neck Surg* 1996;122:143-8.
- 24 Kim BJ, Chung SW, Jung JY, *et al.*. Effect of different sounds on the treatment outcome of tinnitus retraining therapy. *Clin Exp Otorhinolaryngol* 2014;7:87-93.
- 25 Zeman F, Koller M, Figueiredo R, *et al.*. Tinnitus handicap inventory for evaluating treatment effects: which changes are clinically relevant? *Otolaryngol Head Neck Surg* 2011;145:282-7.
- 26 Chang YS, Choi J, Moon IJ, *et al.*. Factors associated with self-reported outcome in adaptation of hearing aid. *Acta Otolaryngol* 2016;136:905-11.
- 27 Scherer RW, Formby C, Gold S, *et al.*. The Tinnitus Retraining Therapy Trial (TRTT): study protocol for a randomized controlled trial. *TRIALS* 2014;15:396.
- 28 von Wedel H, von Wedel UC, Streppel M, *et al.*. [Effectiveness of partial and complete instrumental masking in chronic tinnitus. Studies with reference to retraining therapy]. *HNO* 1997;45:690-4.
- 29 Adjamian P, Sereda M, Zobay O, *et al.*. Neuromagnetic indicators of tinnitus and tinnitus masking in patients with and without hearing loss. *J Assoc Res Otolaryngol* 2012;13:715-31.
- 30 Lanting CP, de Kleine E, van Dijk P. Neural activity underlying tinnitus generation: results from PET and fMRI. *Hear Res* 2009;255:1-13.
- 31 von Wedel H, von Wedel UC, Zorowka P. Tinnitus diagnosis and therapy in the aged. *Acta Otolaryngol Suppl* 1990;476:195-201.
- 32 Seydel C, Haupt H, Olze H, *et al.*. Gender and chronic tinnitus: differences in tinnitus-related distress depend on age and duration of tinnitus. *Ear Hear* 2013;34:661-72.
- 33 Hall DA, Haider H, Szczepek AJ, *et al.*. Systematic review of outcome domains and instruments used in clinical trials of tinnitus treatments in adults. *Trials* 2016;17(1):270.



**Captions of Figures**

Figure 1. (Color online) The averaged pure tone hearing thresholds on tinnitus ears and non-tinnitus ears in both effective and non-effective groups.

For peer review only

**Table 1. Comparison of demographic and audiological characteristics between the effective and non-effective groups in tinnitus patients with sound masking intervention**

| Variable                                      | Total<br>(n=102) | Effective<br>Group (n=51) | Non-effective<br>Group (n=51) | Chi-square/<br>t-test | p value           |
|-----------------------------------------------|------------------|---------------------------|-------------------------------|-----------------------|-------------------|
| <b>Demographic characteristics</b>            |                  |                           |                               |                       |                   |
| Age (years, Mean±SD)                          | 44.98 ± 15.41    | 41.20 ± 15.41             | 48.76 ± 14.58                 | -2.55                 | <b>0.012*</b>     |
| Gender (n, %)                                 |                  |                           |                               | 2.53                  | 0.163             |
| <i>Male</i>                                   | 46 (45.1%)       | 19 (37.3%)                | 27 (52.9%)                    |                       |                   |
| <i>Female</i>                                 | 56 (54.9%)       | 32 (62.7%)                | 24 (47.1%)                    |                       |                   |
| <b>Hearing status</b>                         |                  |                           |                               |                       |                   |
| Hearing threshold in<br>tinnitus ears (dB HL) | 53.75 ± 27.66    | 52.51 ± 26.94             | 54.98 ± 28.57                 | -0.45                 | 0.65              |
| Audiogram configurations (n, %)               |                  |                           |                               | 8.30                  | <b>0.04*</b>      |
| <i>Flat</i>                                   | 50 (49.02%)      | 32 (62.75%)               | 18 (35.29%)                   |                       |                   |
| <i>HFGS</i>                                   | 21 (20.59%)      | 9 (17.65%)                | 12 (23.53%)                   |                       |                   |
| <i>HFSS</i>                                   | 24 (23.63%)      | 8 (15.69%)                | 16 (31.37%)                   |                       |                   |
| <i>Others</i>                                 | 7 (6.76%)        | 2 (3.91%)                 | 5 (9.81%)                     |                       |                   |
| <b>Tinnitus characteristics</b>               |                  |                           |                               |                       |                   |
| Laterality (n, %)                             |                  |                           |                               | 0.00                  | 1.00              |
| <i>Left</i>                                   | 54 (52.94%)      | 27 (52.94%)               | 27 (52.94%)                   |                       |                   |
| <i>Right</i>                                  | 36 (35.29%)      | 18 (35.29%)               | 18 (35.29%)                   |                       |                   |
| <i>Binaural</i>                               | 12 (11.77%)      | 6 (11.77%)                | 6 (11.77%)                    |                       |                   |
| Duration (n, %)                               |                  |                           |                               | 0.82                  | 0.66              |
| <i>Acute (&lt;1 month)</i>                    | 68 (66.66%)      | 32 (62.75%)               | 36 (70.59%)                   |                       |                   |
| <i>Subacute (1-3 months)</i>                  | 17 (16.67%)      | 10 (19.61%)               | 7 (13.73%)                    |                       |                   |
| <i>Chronic (&gt;3 months)</i>                 | 17 (16.67%)      | 9 (17.64%)                | 8 (15.68%)                    |                       |                   |
| Tinnitus pitch (n, %)                         |                  |                           |                               | 4.29                  | 0.12              |
| <i>Low (250-1000) Hz</i>                      | 17 (16.67%)      | 6 (11.76%)                | 11 (21.57%)                   |                       |                   |
| <i>Mid (1000-4000) Hz</i>                     | 24 (23.53%)      | 16 (31.37%)               | 8 (15.69%)                    |                       |                   |
| <i>High (4000-8000) Hz</i>                    | 61 (59.80%)      | 29 (56.87%)               | 32 (62.74%)                   |                       |                   |
| Tinnitus loudness (dB)                        | 61.23 ± 23.42    | 61.10 ± 24.71             | 61.35 ± 22.30                 | -0.06                 | 0.96              |
| <b>Outcome measurement</b>                    |                  |                           |                               |                       |                   |
| Pre-treatment THI                             | 45.80 ± 21.76    | 54.04 ± 18.45             | 37.57 ± 21.86                 | 4.11                  | <b>&lt;0.001*</b> |
| Post- treatment THI                           | 35.76 ± 19.94    | 34.94 ± 17.39             | 36.59 ± 22.35                 | -0.42                 | 0.679             |
| THI change                                    | 10.04 ± 11.64    | 19.10 ± 9.69              | 0.98 ± 3.54                   | 12.54                 | <b>&lt;0.001*</b> |

Notes: \*: Statistical significance;

THI: Tinnitus Handicap Inventory;

HFGS: High-frequency gently sloping;

HFSS: High-frequency steeply sloping.

Table 2. Association of socio-demographic factors and audiogram configurations with effective therapy: multivariate logistic regression analysis

| Variables                | <i>B</i>  | <i>SE</i> | <i>Wald</i> | <i>P</i> value    | <i>OR</i> | 95% <i>CI</i> |       |
|--------------------------|-----------|-----------|-------------|-------------------|-----------|---------------|-------|
|                          |           |           |             |                   |           | Lower         | Upper |
| Age (year)               | -0.04     | 0.17      | 7.34        | <b>0.007*</b>     | 0.96      | 0.93          | 0.99  |
| Audiogram configurations |           | 9.18      |             | <b>0.027*</b>     |           |               |       |
| Flat                     | 1.70      | 0.61      | 7.85        | <b>0.005*</b>     | 5.45      | 1.67          | 17.86 |
| HFSS                     | 0.81      | 0.71      | 1.31        | 0.252             | 2.24      | 0.56          | 8.93  |
| HFSS                     | reference |           |             |                   | 1.00      |               |       |
| Others                   | 0.05      | 1.03      | <0.01       | 0.960             | 1.05      | 0.14          | 7.89  |
| Prior treatment THI      | 0.04      | 0.01      | 12.58       | <b>&lt;0.001*</b> | 1.04      | 1.02          | 1.07  |

Notes: \*: Statistical significance;

OR: Odds Ratio;

95% CI: 95% Confidence Interval.

1  
2  
3  
4  
5  
6  
7  
8  
9  
10  
11  
12  
13  
14  
15  
16  
17  
18  
19  
20  
21  
22  
23  
24  
25  
26  
27  
28  
29  
30  
31  
32  
33  
34  
35  
36  
37  
38  
39  
40  
41  
42  
43  
44  
45  
46  
47  
48  
49  
50  
51  
52  
53  
54  
55  
56  
57  
58  
59  
60

Figure 1



Figure 1. (Color online) The averaged pure tone hearing thresholds on tinnitus ears and non-tinnitus ears in both effective and non-effective groups.

190x107mm (300 x 300 DPI)

Review only

STROBE Statement—Checklist of items that should be included in reports of *cross-sectional studies*

|                              | Page No                | Recommendation                                                                                                                                                                                                                                                                                                                             |
|------------------------------|------------------------|--------------------------------------------------------------------------------------------------------------------------------------------------------------------------------------------------------------------------------------------------------------------------------------------------------------------------------------------|
| <b>Title and abstract</b>    | 1                      | (a) Indicate the study's design with a commonly used term in the title or the abstract<br>(b) Provide in the abstract an informative and balanced summary of what was done and what was found                                                                                                                                              |
| <b>Introduction</b>          |                        |                                                                                                                                                                                                                                                                                                                                            |
| Background/rationale         | 4-5                    | Explain the scientific background and rationale for the investigation being reported                                                                                                                                                                                                                                                       |
| Objectives                   | 6                      | State specific objectives, including any prespecified hypotheses                                                                                                                                                                                                                                                                           |
| <b>Methods</b>               |                        |                                                                                                                                                                                                                                                                                                                                            |
| Study design                 | 6,8                    | Present key elements of study design early in the paper                                                                                                                                                                                                                                                                                    |
| Setting                      | 6                      | Describe the setting, locations, and relevant dates, including periods of recruitment, exposure, follow-up, and data collection                                                                                                                                                                                                            |
| Participants                 | 6                      | (a) Give the eligibility criteria, and the sources and methods of selection of participants                                                                                                                                                                                                                                                |
| Variables                    | 7-8                    | Clearly define all outcomes, exposures, predictors, potential confounders, and effect modifiers. Give diagnostic criteria, if applicable                                                                                                                                                                                                   |
| Data sources/<br>measurement | 7-8*                   | For each variable of interest, give sources of data and details of methods of assessment (measurement). Describe comparability of assessment methods if there is more than one group                                                                                                                                                       |
| Bias                         | 6,8,14                 | Describe any efforts to address potential sources of bias                                                                                                                                                                                                                                                                                  |
| Study size                   | 6                      | Explain how the study size was arrived at                                                                                                                                                                                                                                                                                                  |
| Quantitative variables       | 9                      | Explain how quantitative variables were handled in the analyses. If applicable, describe which groupings were chosen and why                                                                                                                                                                                                               |
| Statistical methods          | 9                      | (a) Describe all statistical methods, including those used to control for confounding<br>(b) Describe any methods used to examine subgroups and interactions<br>(c) Explain how missing data were addressed<br>(d) If applicable, describe analytical methods taking account of sampling strategy<br>(e) Describe any sensitivity analyses |
| <b>Results</b>               |                        |                                                                                                                                                                                                                                                                                                                                            |
| Participants                 | 9*                     | (a) Report numbers of individuals at each stage of study—eg numbers potentially eligible, examined for eligibility, confirmed eligible, included in the study, completing follow-up, and analysed<br>(b) Give reasons for non-participation at each stage<br>(c) Consider use of a flow diagram                                            |
| Descriptive data             | 9-11,<br>table1*       | (a) Give characteristics of study participants (eg demographic, clinical, social) and information on exposures and potential confounders<br>(b) Indicate number of participants with missing data for each variable of interest                                                                                                            |
| Outcome data                 | 9-11,<br>table1,2<br>* | Report numbers of outcome events or summary measures                                                                                                                                                                                                                                                                                       |
| Main results                 | 9-11,<br>table1,2      | (a) Give unadjusted estimates and, if applicable, confounder-adjusted estimates and their precision (eg, 95% confidence interval). Make clear which confounders were adjusted for and why they were included                                                                                                                               |

|                          |                 |                                                                                                                                                                            |
|--------------------------|-----------------|----------------------------------------------------------------------------------------------------------------------------------------------------------------------------|
|                          |                 | (b) Report category boundaries when continuous variables were categorized                                                                                                  |
|                          |                 | (c) If relevant, consider translating estimates of relative risk into absolute risk for a meaningful time period                                                           |
| Other analyses           | 9-11, table 1,2 | Report other analyses done—eg analyses of subgroups and interactions, and sensitivity analyses                                                                             |
| <b>Discussion</b>        |                 |                                                                                                                                                                            |
| Key results              | 11-12           | Summarise key results with reference to study objectives                                                                                                                   |
| Limitations              | 14              | Discuss limitations of the study, taking into account sources of potential bias or imprecision. Discuss both direction and magnitude of any potential bias                 |
| Interpretation           | 11-13           | Give a cautious overall interpretation of results considering objectives, limitations, multiplicity of analyses, results from similar studies, and other relevant evidence |
| Generalisability         | 11-13           | Discuss the generalisability (external validity) of the study results                                                                                                      |
| <b>Other information</b> |                 |                                                                                                                                                                            |
| Funding                  | 15              | Give the source of funding and the role of the funders for the present study and, if applicable, for the original study on which the present article is based              |

\*Give information separately for exposed and unexposed groups.

**Note:** An Explanation and Elaboration article discusses each checklist item and gives methodological background and published examples of transparent reporting. The STROBE checklist is best used in conjunction with this article (freely available on the Web sites of PLoS Medicine at <http://www.plosmedicine.org/>, Annals of Internal Medicine at <http://www.annals.org/>, and Epidemiology at <http://www.epidem.com/>). Information on the STROBE Initiative is available at [www.strobe-statement.org](http://www.strobe-statement.org).
